# Supplementary material for: Ranking the risk of animal-to-human spillover for newly discovered viruses
Source: PubMed Central journal article supplement — Proc Natl Acad Sci U S A. 2021 Apr 5;118(15):e2002324118. doi: 10.1073/pnas.2002324118 (PMC8053939; doi:10.1073/pnas.2002324118), 2021-04-05
Supplement: pnas.2002324118.sapp.pdf [file pnas.2002324118.sapp.pdf]

1 **Supplementary Information:**

2 **Ranking the risk of animal-to-human spillover for newly discovered viruses**

3 **Authors**

4 Zoë L. Grange<sup>1</sup>, Tracey Goldstein<sup>1§</sup>, Christine K. Johnson<sup>1§</sup>, Simon Anthony<sup>1,2,3,4</sup>, Kirsten Gilardi<sup>1</sup>, Peter Daszak<sup>2</sup>,  
5 Kevin J. Olival<sup>2</sup>, Tammie O'Rourke<sup>5</sup>, Suzan Murray<sup>6</sup>, Sarah H. Olson<sup>7</sup>, Eri Togami<sup>1</sup>, Gema Vidal<sup>1</sup>, Expert Panel<sup>8</sup>,  
6 PREDICT Consortium<sup>9</sup>, and Jonna A.K. Mazet<sup>1\*</sup>

7 **Author Affiliations**

8 <sup>1</sup>One Health Institute and Karen C. Drayer Wildlife Health Center, School of Veterinary Medicine, University of  
9 California, Davis, California 95616, USA

10 <sup>2</sup>EcoHealth Alliance, New York, 1001, New York, USA

11 <sup>3</sup>Center for Infection and Immunity, Mailman School of Public Health, Columbia University, New York, New York  
12 10032, USA

13 <sup>4</sup>Department of Epidemiology, Mailman School of Public Health, Columbia University, New York,  
14 New York, 10032, USA

15 <sup>5</sup>Metabiota, Inc. 7-1611 Bowen Road, Nanaimo, BC V9S 1G5, Canada

16 <sup>6</sup>Global Health, Smithsonian Conservation Biology Institute, Washington, DC 20008, USA

17 <sup>7</sup>Wildlife Conservation Society, New York, New York, 10460, USA

18 <sup>§</sup>Co-second authors

19 **Corresponding Author:** [\\*jkmazet@ucdavis.edu](mailto:*jkmazet@ucdavis.edu) One Health Institute and Karen C. Drayer Wildlife Health Center,  
20 School of Veterinary Medicine, University of California, Davis, California 95616, USA, +1 530 752 7526

21

22

23

24 **This file includes:**

25 Supplementary Information Text ..... 3

26 SI Methods ..... 3

27 *Viral Risk Ranking Framework*..... 3

28 *Reference Data Sources for Risk Factors and Viruses and Viruses and Viruses* ..... 3

29 *Risk Factor Methods* ..... 4

30 **Host Risk Factors** ..... 4

31 **Environmental Risk Factors** ..... 13

32 **Virus Risk Factors** ..... 21

33 *Creating a Database of Viruses of Animal Origin*..... 33

34 PREDICT Dataset..... 33

35 Figures S1 to S6 ..... 35

36 Tables S32 to S33..... 40

37 SI References ..... 41

38 List of group authors ..... 45

39

40 **Other supplementary materials for this manuscript include the following:**

41 All datasets along with the R code and R package dependencies needed to fully replicate and evaluate these analyses  
 42 are provided on the Open Science Framework at the following  
 43 link [https://osf.io/mb6qn/?view\\_only=f6326d48d7d941afa7af02714819a1a2](https://osf.io/mb6qn/?view_only=f6326d48d7d941afa7af02714819a1a2) The top-level README.txt file in the  
 44 directory details the file structure and metadata provided. The R code contains functions to extract information for  
 45 risk factors, if applicable from static data sources. The functions are designed so that data sources can be updated in  
 46 the future, as and when new information becomes available.

47 For future additions of viruses into the database, the Spillover website uses the R codes, functions, datasets and  
 48 methods described below as a basis to automatically provide answers. Automatic answers, where applicable are  
 49 editable by the submitter and website administrators to improve accuracy.

## 50 **Supplementary Information Text**

### 51 **SI Methods**

#### 52 **Viral Risk Ranking Framework**

53 Detailed methodologies for each of the 31 risk factors used in the risk ranking assessment are described below.  
54 Eleven risk factors assessed by experts as having low or no contribution to spillover risk, evidenced by a *Risk Factor*  
55 *Influence* score of below two (see manuscript), were not included in the relative risk but methods for their  
56 classification are described for reference and tagged with ‘NOT INCLUDED IN TOP 31 RISK FACTORS’ in case  
57 they are useful for inclusion later in the risk ranking framework, as the scientific process reveals more information  
58 on the relative importance of risk factors for estimating spillover risk for potentially zoonotic viruses.

#### 59 ***Reference Data Sources for Risk Factors and Viruses and Viruses and Viruses***

60 The International Committee on Taxonomy of Viruses (ICTV) 2015 Master Species List (MSL30) version  
61 5/24/2016 (referred to as ICTV list) was downloaded from the ICTV online database (<https://talk.ictvonline.org/>)  
62 and used as a reference of known virus species within 26 target viral families of concern to human health  
63 (*Anelloviridae, Arenaviridae, Bornaviridae, Bunyaviridae, Coronaviridae, Filoviridae, Flaviviridae,*  
64 *Hepadnaviridae, Hepeviridae, Orthomyxoviridae, Paramyxoviridae, Picornaviridae, Reoviridae, Retroviridae,*  
65 *Rhabdoviridae, Togaviridae, Astroviridae, Caliciviridae, Picobirnaviridae, Arteriviridae, Herpesviridae,*  
66 *Poxviridae, Parvoviridae, Adenoviridae, Papillomaviridae, Polyomaviridae*)(1). Plant virus species were removed  
67 from the list and not assessed or included in any analyses, resulting in a master ICTV list of 1,126 virus species.  
68 A literature review of three reference virology textbooks(2-4), four human/zoonotic virus databases(5-8) and a  
69 literature search of all databases in the Web of Science using the search term: ‘Virus Name’ AND ‘Humans’ was  
70 conducted for each virus species in the ICTV list to characterize zoonotic potential and obtain information required  
71 for several risk factors, as well as to provide auto-populated data for the risk ranking application. For each virus  
72 species, we assessed its ability to infect and pathogenicity in a taxonomic group (human, terrestrial mammals, birds,  
73 other animals), duration of infection in humans, transmissibility between humans, zoonotic ability and whether the

74 virus has caused an epidemic or pandemic in humans/animals. Further details are provided within each risk factor  
75 method described below.

76 Additionally, we extracted virus detection data from the NCBI nucleotide database (<ftp://ftp.ncbi.nlm.nih.gov/ncbi->  
77 [asn1/](ftp://ftp.ncbi.nlm.nih.gov/ncbi-asn1/)) on June 8<sup>th</sup>, 2018. Attributes including accession number, organism name, host species, sample description  
78 and country of detection were extracted from Genbank files using a custom python script in Anaconda Jupyter  
79 software(9) using Biopython Entrez and SeqIO(10). A list of taxon IDs was extracted from the NCBI taxonomy  
80 database for each virus species in the ICTV virus list (described above) and used to select all NCBI nucleotide  
81 records associated with a given virus species designation and its synonyms. Due to ambiguity of data sources, such  
82 as experimental infections and inaccuracies in reported location, data without references (a Pubmed ID) were  
83 removed from the database. Host species data were cleaned using accepted scientific names and taxonomy in the  
84 IUCN Red List(11), and when not available, the Catalogue of life(12). Country names/designations were corrected  
85 as per the IUCN Red List database(11) based on ISO 3166 list of countries. Reports of unknown species origin and  
86 viral sequences originating from domestic species (animals that have been domesticated to be kept as pets or food),  
87 environmental samples, cell lines, cloned sequences, laboratory isolates and/or synthetic constructs were removed  
88 from the dataset. When available, the longitude and latitude of the host species where sampled were extracted from  
89 the public resources. If not available, the central coordinates of the reported nearest village or town were used as a  
90 reference point. If location was only provided at the state district or provincial level, the geographic coordinates  
91 were classified as unknown.

## 92 **Risk Factor Methods**

### 93 *Host Risk Factors*

#### 94 **Host plasticity - No. of species / No. of orders**

95 Host plasticity is a measure of the diversity (number of species) and breadth (number of orders) of hosts the virus is  
96 known to infect. Host species are limited to the taxonomic classes *Mammalia*, *Aves*, *Reptilia* and *Amphibia*,  
97 excluding (excluding humans (*Homo sapiens*) and domestic species (animals that have been domesticated to be kept  
98 as pets or food). Host taxonomy are formatted in the first instance using accepted scientific names in the IUCN Red  
99 List(11), and when not available, the Catalogue of life database (12), last downloaded using an API in October 2020.

100 In order to keep information up to date, the administrators of the SpillOver website will download new versions of  
101 databases on a regular basis and update the database, which will recalculate the ranking of viruses in the database  
102 available in the webtool.

103 Using the cleaned NCBI nucleotide database extraction for viruses in the ICTV list described above, the total  
104 number of hosts species and orders identified for each virus (Fig. S3) were used to inform categorization of the two  
105 host plasticity risk factors into the following groups: 1 species, 2 species, 3-5 species, 6-10 species, and more than  
106 10 species.

107 *Risk Levels* were assigned for a virus by counting the total number of unique host species/orders in the database,  
108 assigning *Risk Level* as shown below. Cases for which a host species was identified only at the genus level were not  
109 included in calculations of host diversity, unless the virus had only been recorded in an unidentified host species,  
110 then a *Risk Level Score* of 1 was assigned.

111 **Table S1:** Risk Levels and associated Risk Level Scores assigned to the risk factor ‘Host plasticity’

| <i>Risk Level</i>      | <i>Risk Level Score</i> |
|------------------------|-------------------------|
| 1 species / order      | 1                       |
| 2 species / order      | 2                       |
| 3 - 5 species / order  | 3                       |
| 6 - 10 species / order | 4                       |
| > 10 species / order   | 5                       |

112 NOTE: *Risk Level* is grouped by virus

113 Virus Data Risk calculation:

114 Host plasticity - No. of species: *Risk Factor Influence* (2.632707775) x *Risk Level Score*

115 Host plasticity - No. of orders: *Risk Factor Influence* (2.768817204) x *Risk Level Score*

116 **Host sample type diversity – NOT INCLUDED IN TOP 31 RISK FACTORS**

117 Samples were classified into body system categories: Cardiovascular system (i.e. blood, heart), Digestive system  
118 (i.e. intestine), Endocrine system (i.e. skin, hair), Integumentary system (i.e. skin, hair), Urogenital system (i.e.  
119 urine, urogenital swab), Lymphatic system (i.e. lymph node), Muscular Skeletal System (i.e. muscle tissue, bone),  
120 Nervous system (i.e. brain, nerve), Respiratory system (i.e. oral or nasal swab, lung). Fecal (i.e. stool) samples are  
121 assigned their own category. *Risk Levels* categories were calculated as the total number of unique body system  
122 categories the virus is known to infect across the host species in the database. Virus sample diversity is the number  
123 of unique body system categories listed within the database listed.

124 **Table S2:** Risk Levels and associated Risk Level Scores assigned to the risk factor ‘Host sample type diversity’

| <i>Risk Level</i>         | <i>Risk Level Score</i> |
|---------------------------|-------------------------|
| 1 body system category    | 0.5                     |
| 2 body system categories  | 1.0                     |
| 3 body system categories  | 1.5                     |
| 4 body system categories  | 2.0                     |
| 5 body system categories  | 2.5                     |
| 6 body system categories  | 3.0                     |
| 7 body system categories  | 3.5                     |
| 8 body system categories  | 4.0                     |
| 9 body system categories  | 4.5                     |
| 10 body system categories | 5.0                     |
| Unknown                   | 2.5                     |

125 NOTE: *Risk Level* ‘Unknown’ with a set *Risk Level Score* of 2.5 is only used if no other *Risk Level* is available.

126 Virus Data Risk calculation:

127 *Risk Factor Influence (1.943) x Risk Level Score*

128 **Conservation status of the host species – NOT INCLUDED IN TOP 31 RISK FACTORS**

129 A custom function “HostTaxonomy” was created within R software(13) using rredlist(14) and sqldf(15). For IUCN  
130 Red List-recognized host species, conservation measures (Least Concern or Lower Risk – least concern, Lower Risk  
131 – conservation dependent, Near Threatened or Lower Risk – near threatened, Vulnerable, Endangered, Critically  
132 Endangered, Extinct in the Wild, Extinct, Data Deficient, Unknown) were extracted from the IUCN Red List  
133 database using a personal API token(11). The information in this study is valid as of October 2020. For future  
134 updates to the risk ranking, the Spillover website has the functionality to update from the IUCN Red List database  
135 on a regular basis. Species not assessed by the IUCN, are defaulted as ‘Unknown’ conservation status.

136 **Table S3:** Risk Levels and associated Risk Level Scores assigned to the risk factor ‘Conservation status of host  
137 species’

| <i>Risk Level</i>                   | <i>Risk Level Score</i> |
|-------------------------------------|-------------------------|
| Extinct                             | 0                       |
| Extinct in the wild                 | 1                       |
| Endangered                          | 3                       |
| Vulnerable                          | 3                       |
| Near Threatened                     | 3                       |
| Lower Risk - near threatened        | 3                       |
| Data Deficient                      | 3                       |
| Lower Risk - conservation dependent | 4                       |
| Critically Endangered               | 5                       |
| Least concern                       | 5                       |
| Lower Risk - least concern          | 5                       |

Unknown 2.5

138 *NOTE: If multiple risk levels were present for a virus, the risk level with the highest score was used for the risk*  
139 *calculation. Risk Level ‘Unknown’ with a set Risk Level Score of 2.5 is only used if no other Risk Level is available.*

140 Virus Data Risk calculation:

141 *Risk Factor Influence (1.387) x Risk Level Score*

142 **Habitat breadth of the host(s) – NOT INCLUDED IN TOP 31 RISK FACTORS**

143 Habitat is the place or environment where a plant or animal naturally or normally lives and grows. A custom  
144 function “HostHabitat” was created within R software(13) using rredlist(14) and sqldf(15) to extract habitat use data  
145 for a given host species from the IUCN Red List database using a personal access (API) token(11). For IUCN Red  
146 List-recognized host species, habitats were defined according to IUCN Red List definitions: Artificial – Aquatic,  
147 Artificial – Terrestrial, Caves and Subterranean Habitats, Desert, Forest, Grassland, Introduced Vegetation, Marine –  
148 Coastal, Marine – Intertidal, Marine – Neritic, Marine – Oceanic, Marine - Deep Ocean Floor, Rocky – Areas, Other  
149 Savanna, Shrubland, and Wetlands. For species not assessed by the IUCN Red List, habitat use was listed as  
150 ‘Unknown’. *Risk Levels* were then calculated as the total number of unique habitat categories (excluding  
151 ‘Unknown’) each host species is known to use. The information in this study is valid as of October 2020. For future  
152 updates to the risk ranking, the SpillOver website has the functionality to update from the IUCN Red List database  
153 on a regular basis.

154 **Table S4:** Risk Levels and associated Risk Level Scores assigned to the risk factor ‘Habitat breadth of the host’

| <i>Risk Level</i>    | <i>Risk Level Score</i> |
|----------------------|-------------------------|
| 1 habitat category   | 0.29                    |
| 2 habitat categories | 0.59                    |
| 3 habitat categories | 0.88                    |
| 4 habitat categories | 1.18                    |
| 5 habitat categories | 1.47                    |



|                       |      |
|-----------------------|------|
| 6 habitat categories  | 1.76 |
| 7 habitat categories  | 2.06 |
| 8 habitat categories  | 2.35 |
| 9 habitat categories  | 2.65 |
| 10 habitat categories | 2.94 |
| 11 habitat categories | 3.23 |
| 12 habitat categories | 3.53 |
| 13 habitat categories | 3.82 |
| 14 habitat categories | 4.12 |
| 15 habitat categories | 4.41 |
| 16 habitat categories | 4.70 |
| 17 habitat categories | 5.00 |
| Unknown               | 2.5  |

155 *NOTE: If multiple risk levels were present for a virus, the risk level with the highest score was used for the risk*  
 156 *calculation. Risk Level 'Unknown' with a set Risk Level Score of 2.5 is only used if no other Risk Level is available.*

157 Virus Data Risk calculation:

158 *Risk Factor Influence (1.857) x Risk Level Score*

159 **Diet breadth of the host species – NOT INCLUDED IN TOP 31 RISK FACTORS**

160 Diet breadth for mammals and birds was calculated from the total number of dietary categories outlined in the  
 161 reference dataset produced by Wilman, *et al.* (16). As per their definition, categories included: Invertebrates,  
 162 Birds/Mammals, Reptiles/Snakes/Amphibians/Salamanders, Fish, Vertebrates – other, Scavenged objects, Fruit,  
 163 Nectar/Pollen/Plant exudates/Gums, Seed/Maize/Nuts/Spores/Wheat/Grains, Plant – other. For the purposes of this  
 164 analysis, a species consumes a food category if it's estimated percent use was  $\geq 1\%$ . Scientific names were corrected

165 to align with IUCN Redlist designations, and where duplicate records occurred, the record with the highest  
 166 confidence is taken. Species not assessed by Wilman, *et al.* (16), are defaulted as ‘Unknown’ diet breadth. *Risk*  
 167 *Levels* are calculated as the total number of unique diet categories each host species is known to use.

168 **Table S5:** Risk Levels and associated Risk Level Scores assigned to the risk factor ‘Diet breadth of the host’

| <i>Risk Level</i>  | <i>Risk Level Score</i> |
|--------------------|-------------------------|
| 1 diet category    | 0.5                     |
| 2 diet categories  | 1.0                     |
| 3 diet categories  | 1.5                     |
| 4 diet categories  | 2.0                     |
| 5 diet categories  | 2.5                     |
| 6 diet categories  | 3.0                     |
| 7 diet categories  | 3.5                     |
| 8 diet categories  | 4.0                     |
| 9 diet categories  | 4.5                     |
| 10 diet categories | 5.0                     |
| Unknown            | 2.5                     |

169 *NOTE: If multiple risk levels were present for a virus, the risk level with the highest score was used for the risk*  
 170 *calculation. Risk Level ‘Unknown’ with a set Risk Level Score of 2.5 is only used if no other Risk Level is available.*

171 Virus Data Risk calculation:

172 *Risk Factor Influence (1.059) x Risk Level Score*

173 **Geography of the host(s)**

174 Species range files for *Mammalia*, *Amphibia* and *Reptilia* were downloaded from the IUCN Red List database(11)  
 175 on October 25th 2017. Shapefiles for bird ranges (*Aves*) were provided by Birdlife International(17) (downloaded

176 October 27th 2017). Spatial polygon datasets were uploaded into QGIS (version 3.0.3-Girona)(18) for processing.  
 177 The fix geometry function was conducted on all files to overcome geometry errors. IUCN range files were filtered to  
 178 remove uncertain range files ('Not Mapped', 'Origin uncertain', 'Possibly Extant (resident)', 'Possibly Extinct',  
 179 'Presence Uncertain', 'Probably Extant (resident)'). Species range size was calculated using the lets.rangesize  
 180 function in the R package letsR(13, 19). Bird range files were filtered to remove areas of passage and undetermined  
 181 or sporadic occurrence, thus reducing uncertainty contained in the dataset. Range size attributes were extracted from  
 182 spatial files for bird species range. The sum of all range areas for a given species was calculated in R software(13).  
 183 Country land mass was collected from the World Bank 2016 records(20), unless unavailable, in which case, data  
 184 were extracted from the United Nations 2007 land mass data(21) followed by the CIA World Factbook(22).  
 185 A custom function “HostGeog” was created within R software(13) in order to calculate the geographic range of the  
 186 host species. Country of occurrence for each host species was extracted from the IUCN Red List database(11) using  
 187 sqldf(15) and rredlist(14) with a personal API token.  
 188 Country names/designations are defined as per the IUCN Red List database(11) based on ISO 3166 list of countries.  
 189 Global distribution of the host species is classified according the following descriptions of species occurrence; (1)  
 190 Isolated endemic – one country with a range size <10,000 km<sup>2</sup>, (2) National (small) - a single country with a land  
 191 mass < 2.5 million km<sup>2</sup>, (3) National (large) – a single country with a land mass > 2.5 million km<sup>2</sup>, (4) Regional -  
 192 more than 1 country in 1 WHO region, (5) Semi-global - more than 1 country and 2-3 WHO regions, (6) Global -  
 193 more than 1 country and > 3 WHO regions(23), or (7) Unknown - data not available. In this study, the Arctic region  
 194 and Antarctica are considered a country and their own respective WHO region.

195 **Table S6:** Risk Levels and associated Risk Level Scores assigned to the risk factor ‘Geography of the host’

| <i>Risk Level</i> | <i>Risk Level Score</i> |
|-------------------|-------------------------|
| Isolated          | 1                       |
| National - small  | 2                       |
| National - large  | 3                       |
| Regional          | 3.5                     |

|             |     |
|-------------|-----|
| Semi-global | 4   |
| Global      | 5   |
| Unknown     | 2.5 |

196 *NOTE: If multiple risk levels were present for a virus, the risk level with the highest score was used for the risk*  
 197 *calculation. Risk Level ‘Unknown’ with a set Risk Level Score of 2.5 is only used if no other Risk Level is available.*

198 Virus Data Risk calculation:

199 *Risk Factor Influence (2.418) x Risk Level Score*

## 200 **Genetic relatedness between host species and humans**

201 The timescale of evolutionary divergence is used as an indicator of genetic relatedness between host species and  
 202 humans (*Homo sapiens*). To determine suitable risk level categories, a list of species in the IUCN Red List database  
 203 was downloaded within R software(13) using rredlist(14) with a personal API token on the 31<sup>st</sup> October 2017. Up to  
 204 2 (if available) randomly chosen species per order in the IUCN list was used to evaluate the distribution of  
 205 divergence times across species in the classes *Amphibia*, *Reptilia*, *Aves* and *Mammalia*. For each species, the  
 206 estimated time of divergence (in Million Years Ago, MYA) from humans (*Homo sapiens*) was calculated using  
 207 TimeTree(24) (<http://www.timetree.org/>), and based on their distribution (Fig. S4), the following categories were  
 208 created: Very Close (0-10 MYA), Very Recent (10-50 MYA), Recent (50-100 MYA), Far (100-200 MYA) and  
 209 Very Far (>200 MYA).

210 For each host species in the database, the estimated time of divergence (in Million Years Ago, MYA) from humans  
 211 (*Homo sapiens*) was calculated on the TimeTree website (24) and the value manually entered into a database. A  
 212 function “MYAgroup” was created in R software(13) using sqldf(15) to group the estimated time of divergence for  
 213 each host species accordingly into risk levels. Because this factor is not extractable from a public database without  
 214 further calculation, submitters of viruses to *SpillOver* are provided with simple instructions for calculating it when  
 215 they upload their new virus information.

216 **Table S7:** Risk Levels and associated Risk Level Scores assigned to the risk factor ‘Genetic relatedness between the  
 217 host species and humans’

| <i>Risk Level</i>       | <i>Risk Level Score</i> |
|-------------------------|-------------------------|
| Very Far (>200 MYA)     | 1                       |
| Far (100-200 MYA)       | 2                       |
| Recent (50-100 MYA)     | 3                       |
| Very Recent (10-50 MYA) | 4                       |
| Very Close (0-10 MYA)   | 5                       |
| Unknown                 | 2.5                     |

218 *NOTE: If multiple risk levels were present for a virus, the risk level with the highest score was used for the risk*  
 219 *calculation. Risk Level ‘Unknown’ with a set Risk Level Score of 2.5 is only used if no other Risk Level is available.*

220 Virus Data Risk calculation:

221 Formula: *Risk Factor Influence (2.420) x Risk Level Score*

222 *NOTE: Risk Level ‘Unknown’ with a set Risk Level Score of 2.5 is only used if no other Risk Level available.*

223

## 224 ***Environmental Risk Factors***

### 225 **Land use in the host’s ecosystem**

226 The location where the virus was detected in an animal was used to determine the type of land use in the host’s  
 227 ecosystem. A custom function “LandUse” was created to extract land use categories from the LADA land-use  
 228 systems maps(25) using raster(26), plyr(27) and sqldf(15) packages in R(13). Land use was re-categorized to the  
 229 broader LADA descriptors (Forest, Grasslands, Shrubs, Crops, Agriculture, Urban land, Wetlands, Sparse  
 230 vegetation, Bare areas, Open water, and Unknown for undefined or data deficient areas).

231 **Table S8:** Risk Levels and associated Risk Level Scores assigned to the risk factor ‘Land use in the host ecosystem’

232

| <i>Risk Level</i> | <i>Risk Level Score</i> |
|-------------------|-------------------------|
| Forest            | 5                       |
| Grasslands        | 3                       |
| Shrubs            | 2                       |
| Crops             | 4                       |
| Agriculture       | 4                       |
| Urban land        | 3.5                     |
| Wetlands          | 2                       |
| Sparse vegetation | 2                       |
| Bare areas        | 1                       |
| Open water        | 1                       |
| Unknown           | 2.5                     |

233 *NOTE: If multiple risk levels were present for a virus, the risk level with the highest score was used for the risk*  
 234 *calculation. Risk Level ‘Unknown’ with a set Risk Level Score of 2.5 is only used if no other Risk Level is available.*

235 Virus Data Risk calculation:

236 Formula: *Risk Factor Influence (2.113) x Risk Level Score*

237 **Livestock density the host’s ecosystem**

238 The location where the virus was detected in an animal was used to determine the livestock density in the host’s  
 239 ecosystem. A custom function “Livestock” was created to extract livestock density from LADA land-use systems  
 240 maps(25) using raster(26), plyr(27) and sqldf(15) packages in R(13). Using LADA definitions, livestock density was  
 241 assigned as either High, Medium, Low, None, or Unknown for undefined or data deficient areas.

242 **Table S9:** Risk Levels and associated Risk Level Scores assigned to the risk factor ‘Livestock density in the host  
 243 ecosystem’

| <i>Risk Level</i> | <i>Risk Level Score</i> |
|-------------------|-------------------------|
| High              | 5                       |
| Low               | 1                       |
| Medium            | 3                       |
| No Livestock      | 0                       |
| Unknown           | 2.5                     |

244 *NOTE: If multiple risk levels were present for a virus, the risk level with the highest score was used for the risk*  
 245 *calculation. Risk Level ‘Unknown’ with a set Risk Level Score of 2.5 is only used if no other Risk Level is available.*

246 Virus Data Risk calculation:

247 *Risk Factor Influence (2.175) x Risk Level Score*

248 **Human population density in the host’s ecosystem**

249 The location where the virus was detected in an animal was used to determine the human population density in the  
 250 host’s ecosystem. A custom function “PopDensity2015” was created that uses raster(26), rgdal(28), plyr(27) and  
 251 sqldf(15) packages in R(13) to extract attributes from the NASA Sedac Gridded population of the World UN  
 252 Adjusted population density v4 2015 map(29). Population density was grouped into the following categories:  
 253 Unknown, 0-5, 5-25, 25-250, 250-1,000 and >1,000 people per km<sup>2</sup>.

254 **Table S10:** Risk Levels and associated Risk Level Scores assigned to the risk factor ‘Human population density in  
 255 the host ecosystem’

| <i>Risk Level</i>                     | <i>Risk Level Score</i> |
|---------------------------------------|-------------------------|
| 0-5 persons per km <sup>2</sup>       | 1                       |
| 5-25 persons per km <sup>2</sup>      | 2                       |
| 25-250 persons per km <sup>2</sup>    | 3                       |
| 250-1,000 persons per km <sup>2</sup> | 4                       |

>1,000 persons per km<sup>2</sup> 5

Unknown 2.5

256 *NOTE: If multiple risk levels were present for a virus, the risk level with the highest score was used for the risk*  
257 *calculation. Risk Level ‘Unknown’ with a set Risk Level Score of 2.5 is only used if no other Risk Level is available.*

258 Virus Data Risk calculation:

259 *Risk Factor Influence (2.547) x Risk Level Score*

### 260 **Urbanization in the host’s ecosystem**

261 Probability of urban expansion is used as an indicator of land conversion and urbanization processes. A custom  
262 function “Urbanization” was created to extract probability values from the Global Grid of Probabilities of Urban  
263 Expansion to 2030 using the location where the virus was detected in an animal, if available (30). To account for  
264 data source recommendations, a 20 km radius buffer was applied to longitude and latitude data points, and  
265 probability of urban extraction attributes were extracted from all 5 km<sup>2</sup> grids within the buffer zone using raster(26).  
266 Urbanization in the host’s ecosystem was defined as presence of a high probability (>75%) of urbanization within  
267 the 20 km radius buffer zone.

268 **Table S11:** Risk Levels and associated Risk Level Scores assigned to the risk factor ‘Urbanization in the host  
269 ecosystem’

| <i>Risk Level</i> | <i>Risk Level Score</i> |
|-------------------|-------------------------|
| No                | 0                       |
| Yes               | 5                       |
| Unknown           | 2.5                     |

270 *NOTE: If multiple risk levels were present for a virus, the risk level with the highest score was used for the risk*  
271 *calculation. Risk Level ‘Unknown’ with a set Risk Level Score of 2.5 is only used if no other Risk Level is available.*

272 Virus Data Risk calculation:

273 *Risk Factor Influence (2.246) x Risk Level Score*



274 **Agricultural intensification in the host’s ecosystem**

275 Agricultural intensification was defined as presence of novel pasture or cropland within a 20 km radius buffer of the  
276 longitude and latitude of where the virus was detected in an animal, if available. Using previously described  
277 methods, global maps of cropland, pasture, and urban layers were adapted from the publicly available HYDE 2005  
278 dataset (31, 32), which assigns a percentage score for each land use category (e.g. 14% Urban, 29% Crops, 41%  
279 Pasture) to each raster cell. Cells within the layers were re-categorized as only one land use type: urban cells were  
280 defined as those containing greater than 25% urban land, while cells with at least 50% human land-use were  
281 assigned either pasture or crops, depending on which is greater. Areas with less than 50% human land-use and less  
282 than 25% urban land were not assigned a land-use type. The cells in resulting rasters have one of three values: 1 =  
283 urban, 3 = crops, 5 = pasture. For the purposes of this analysis, a map of land use change over time was created by  
284 assigning human land-use categories as above for both HYDE datasets for 1970 and 2005, and then highlighting  
285 only cells with novel Urban, Pasture or Crop development since 1970. Using a custom R script, a 20 km radius  
286 buffer is applied to the longitude and latitude of where the virus was detected in an animal using the raster(26)  
287 package. Land use change attributes are then extracted from all cells within the buffer zone, and agricultural  
288 intensification is assigned if there is presence of novel pasture or cropland within any of the cells of the buffer zone.

289 **Table S12:** Risk Levels and associated Risk Level Scores assigned to the risk factor ‘Agricultural intensification in  
290 the host ecosystem’

| <i>Risk Level</i> | <i>Risk Level Score</i> |
|-------------------|-------------------------|
| Yes               | 5                       |
| No                | 0                       |
| Unknown           | 2.5                     |

291 *NOTE: If multiple risk levels were present for a virus, the risk level with the highest score was used for the risk*  
292 *calculation. Risk Level ‘Unknown’ with a set Risk Level Score of 2.5 is only used if no other Risk Level is available.*

293 Virus Data Risk calculation:

294 *Risk Factor Influence (2.262) x Risk Level Score*

295 **Forest degradation / deforestation in the host’s ecosystem**

296 Loss in the forest canopy cover, defined as vegetation taller than 5 m in height, was used as an indicator of forest  
297 degradation/deforestation in the host’s ecosystem. Using a custom function called “Deforestation” that calls  
298 packages gfcanalysis(33), sqldf(15), rgdal(28) and raster(26), annual forest cover and forest loss (in hectares) for  
299 each longitude and latitude of where the virus was detected in an animal was extracted from the Global Forest  
300 Change 2017 dataset(34) using a 20 km buffer zone around spatial points and a forest cover threshold set at 30%(35,  
301 36). Percentage loss of tree cover was calculated on an annual time scale between 2000 and 2017 from the  
302 difference between annual area cover and loss. Finally, forest degradation/deforestation was determined to be  
303 present if there was  $\geq 20\%$  forest cover change between 2000 and 2017, as per the FAO 2015 Global Forest  
304 Resources Assessment definition forest cover change(37).

305 **Table S13:** Risk Levels and associated Risk Level Scores assigned to the risk factor ‘Forest degradation /  
306 deforestation in the host ecosystem’

| <i>Risk Level</i> | <i>Risk Level Score</i> |
|-------------------|-------------------------|
| Yes               | 5                       |
| No                | 0                       |
| Unknown           | 2.5                     |

307 *NOTE: If multiple risk levels were present for a virus, the risk level with the highest score was used for the risk*  
308 *calculation. Risk Level ‘Unknown’ with a set Risk Level Score of 2.5 is only used if no other Risk Level is available.*

309 Virus Data Risk calculation:

310 *Risk Factor Influence (2.271) x Risk Level Score*

311 **Number of primary high-risk disease transmission interfaces**

312 High-risk disease transmission interfaces were defined and adapted from categories previously described in Johnson,  
313 *et al.* (8). For this study, direct and indirect interface categories were combined into one group, and the category  
314 ‘Restaurant’ replaced ‘Consumed’ as the interface description. Four extra categories were added including:  
315 Extractive Industry, Livestock, Pristine Habitat and Wild Animal Farm. Therefore, categories were as follows:

316 Hunted, Wildlife Management, Human Dwellings, Market, Ecotourism, Veterinarian or Researcher, Crop or  
 317 Agricultural, Pristine Habitat, Zoo or Sanctuary, Extractive Industry, Restaurant, Wild Animal Farm, Livestock, Pets  
 318 - wild animal, Pets - domestic animal, Laboratory and Unknown. *Risk Levels* were calculated as the total number of  
 319 unique interface categories in which animals have tested positive for the virus in the database.

320 **Table S14:** Risk Levels and associated Risk Level Scores assigned to the risk factor ‘Number of primary disease  
 321 transmission interfaces’

| <i>Risk Level</i>       | <i>Risk Level Score</i> |
|-------------------------|-------------------------|
| 1 interface category    | 0.3125                  |
| 2 interface categories  | 0.625                   |
| 3 interface categories  | 0.938                   |
| 4 interface categories  | 1.25                    |
| 5 interface categories  | 1.56                    |
| 6 interface categories  | 1.88                    |
| 7 interface categories  | 2.19                    |
| 8 interface categories  | 2.5                     |
| 9 interface categories  | 2.81                    |
| 10 interface categories | 3.13                    |
| 11 interface categories | 3.44                    |
| 12 interface categories | 3.75                    |
| 13 interface categories | 4.06                    |
| 14 interface categories | 4.38                    |
| 15 interface categories | 4.69                    |
| 16 interface categories | 5.00                    |

Unknown 2.5

322 *NOTE: If multiple risk levels were present for a virus, the risk level with the highest score was used for the risk*  
323 *calculation. Risk Level ‘Unknown’ with a set Risk Level Score of 2.5 is only used if no other Risk Level is available.*

324 Virus Data Risk calculation:

325 *Risk Factor Influence (2.658) x Risk Level Score*

326 **Frequency and intimacy of contact at the transmission interface**

327 The frequency and intimacy of contact between humans and wildlife and humans and domestic animals for each  
328 primary transmission interface were assessed based on expert opinion and risk characterization of primary interfaces  
329 during our virus discovery project activities. *Risk Levels* were categorized for each primary interface as follows:  
330 Unknown, Low, Medium or High. Levels were automatically assigned to the primary interface in which animals  
331 have tested positive for the virus. Unknown *Risk Levels* are assigned when no primary interface was available.

332 **Table S15:** Risk Levels and associated Risk Level Scores assigned to the risk factor ‘Frequency and intimacy of  
333 contact at the transmission interface’

| <i>Risk Level</i> | <i>Risk Level Score</i> |
|-------------------|-------------------------|
| Low               | 1                       |
| Medium            | 3                       |
| High              | 5                       |
| None              | 0                       |
| Unknown           | 2.5                     |

334 *NOTE: If multiple risk levels were present for a virus, the risk level with the highest score was used for the risk*  
335 *calculation. Risk Level ‘Unknown’ with a set Risk Level Score of 2.5 is only used if no other Risk Level is available.*

336 Virus Data Risk calculation:

337 Frequency of interaction: domestic animals – humans: *Risk Factor Influence (2.540) x Risk Level Score*

338 Intimacy of interaction: domestic animals – humans: *Risk Factor Influence (2.514) x Risk Level Score*

339 Frequency of interaction: wild animals – humans: *Risk Factor Influence (2.709) x Risk Level Score*

340 Intimacy of interaction: wild animals – humans: *Risk Factor Influence (2.709) x Risk Level Score*

341

## 342 ***Virus Risk Factors***

### 343 **Characteristics of a virus**

344 Three properties based on the nature of the viral genome were extracted from the Tenth Report of the International  
345 Committee on Taxonomy of Viruses (ICTV)(38). Descriptors include genome type (DNA or RNA), whether a virus  
346 has an envelope surrounding its genome, and if the viral genome is broken up into segments. Segmentation was  
347 defined as more than one linear or circular genomic segment. Properties were assigned to a virus based on the virus  
348 family to which they belong.

### 349 **Genome classification of the virus**

350 **Table S16:** Risk Levels and associated Risk Level Scores assigned to the risk factor ‘Genome classification of the  
351 virus’

| <i>Risk Level</i> | <i>Risk Level Score</i> |
|-------------------|-------------------------|
| DNA               | 3                       |
| RNA               | 5                       |

352

353 Virus Data Risk calculation:

354 *Risk Factor Influence (2.046) x Risk Level Score*

355

356

### 357 **Envelope status of the virus**

358 **Table S17:** Risk Levels and associated Risk Level Scores assigned to the risk factor ‘Envelope status of the virus’

| <i>Risk Level</i> | <i>Risk Level Score</i> |
|-------------------|-------------------------|
| No                | 5                       |
| Yes               | 3                       |
| Unknown           | 2.5                     |

359

360 Virus Data Risk calculation:

361 *Risk Factor Influence (1.553) x Risk Level Score*

362 *NOTE: Risk Factor Influence is below the threshold of 2, but evidence indicates this risk factor is important for*  
 363 *human-to-human transmission(6)*

364 **Viral genome segmentation**

365 **Table S18:** Risk Levels and associated Risk Level Scores assigned to the risk factor ‘Virus genome segmentation’

| <i>Risk Level</i> | <i>Risk Level Score</i> |
|-------------------|-------------------------|
| Yes               | 3                       |
| No                | 5                       |
| Unknown           | 2.5                     |

366

367 Virus Data Risk calculation:

368 *Risk Factor Influence (1.703) x Risk Level Score*

369 *NOTE: Risk Factor Influence is below the threshold of 2, but evidence indicates this risk factor is important for*  
 370 *human-to-human transmission(6)*

371 **Ability of a virus species to infect humans, terrestrial mammals, birds and other animals**

372 A virus species was classified as able to infect a taxonomic group (human, terrestrial mammals, birds, other animals)  
 373 if identified within either the literature review, nucleotide virus records extracted from NCBI (both described above

374 in ‘Reference Data Sources for Risk Factors and Viruses’), or wildlife detections contained in the database. A  
 375 custom function called “speciesTaxonomy” was created to classify host species as either a Human (*Homo sapiens*),  
 376 Birds (Order belongs to *Aves*), Terrestrial Mammals (mammals that inhabit the land) or Other Animals (all other  
 377 animal that do not belong in previous classifications) (Table S33).

378 **Table S19:** Risk Levels and associated Risk Level Scores assigned to the risk factor ‘Ability of the virus to infect  
 379 humans, terrestrial mammals, birds and other animals’

| <i>Risk Level</i>   | <i>Risk Level Score</i> |
|---------------------|-------------------------|
| Not known to infect | 1                       |
| Yes                 | 5                       |

380

381 Virus Data Risk calculation:

382 Viral infectivity - humans: *Risk Factor Influence* (2.858) x *Risk Level Score*

383 Viral infectivity - terrestrial animals: *Risk Factor Influence* (2.432) x *Risk Level Score*

384 Viral infectivity - birds: *Risk Factor Influence* (1.846) x *Risk Level Score* – NOT INCLUDED IN TOP 31 RISK

385 FACTORS

386 Viral infectivity - other animals: *Risk Factor Influence* (1.460) x *Risk Level Score* – NOT INCLUDED IN TOP

387 31 RISK FACTORS

388 **Proportion of virus species known to infect animal taxa in a viral family**

389 The proportion of virus species known to infect humans, terrestrial mammals, birds and other animals within each of  
 390 the 26 viral families was calculated using the ICTV list of 1,126 viruses. First, a virus species was classified as able  
 391 to infect a taxonomic group if identified as zoonotic from the literature review or if the nucleotide virus records  
 392 extracted from NCBI included human samples (both described above in ‘Reference Data Sources for Risk Factors  
 393 and Viruses’). The proportion of virus species known to infect humans, terrestrial mammals, birds and other animals  
 394 within each virus family was then calculated and grouped into categories: Very Low (0-10%), Low (10-25%),

395 Medium (25-50%), High (50-75%) and Very High (75-100%). The *Risk Level* was determined by the virus family to  
 396 which the virus belongs.

397 **Table S20:** Risk Levels and associated Risk Level Scores assigned to the risk factor ‘Proportion of virus species  
 398 known to infect animal taxa in a viral family’

| <i>Risk Level</i>   | <i>Risk Level Score</i> |
|---------------------|-------------------------|
| Very Low (0-10%)    | 1                       |
| Low (10-25%)        | 2                       |
| Medium (25-50%)     | 3                       |
| High (50-75%)       | 4                       |
| Very High (75-100%) | 5                       |

399  
 400 Virus Data Risk calculation:

401 Proportion viral family infect humans: *Risk Factor Influence* (2.432) x *Risk Level Score*

402 Proportion viral family infect terrestrial animals: *Risk Factor Influence* (1.989) x *Risk Level Score*

403 Proportion viral family infect birds: *Risk Factor Influence* (1.532) x *Risk Level Score* – NOT INCLUDED IN

404 TOP 31 RISK FACTORS

405 Proportion viral family infect other animals: *Risk Factor Influence* (1.167) x *Risk Level Score* – NOT INCLUDED

406 IN TOP 31 RISK FACTORS

407 **Duration of virus species infection in humans**

408 Duration of infection in humans is defined in categories; less than 4 weeks and more than 4 weeks(6), Not known to  
 409 infect humans or Unknown duration. The *Risk Level* was determined by the virus species to which the virus belongs.

410 For virus species within the ICTV list, duration of infection in humans was assessed using the literature review

411 described above. For other virus species, if the virus species was listed as known to infect humans in the risk factor



412 ‘Ability of a virus to infect humans’, it was assigned a risk level of ‘Unknown duration’; if the virus species was not  
413 known to infect humans, it was assigned a risk level of ‘None’.

414 **Table S21:** Risk Levels and associated Risk Level Scores assigned to the risk factor ‘Duration of virus species  
415 infection in humans’

| <i>Risk Level</i>          | <i>Risk Level Score</i> |
|----------------------------|-------------------------|
| Not known to infect humans | 0                       |
| Less than 4 weeks          | 3                       |
| More than 4 weeks          | 5                       |
| Unknown duration           | 2.5                     |

416

417 Virus Data Risk calculation:

418 *Risk Factor Influence (2.021) x Risk Level Score*

419 **Severity of the disease caused by the virus species in humans – NOT INCLUDED IN TOP 31 RISK**  
420 **FACTORS**

421 The severity of illness in humans was classified according to known symptoms and disease caused by a virus species  
422 in people: Deadly (known cause of mortality), Severe Illness (unable to function in a normal manner), Mild Illness  
423 (limited disruption to function), Found in a sick human of unknown cause of illness or Not known to cause disease.

424 The *Risk Level* was determined by the virus species to which the virus belongs. For virus species within the ICTV  
425 list, severity of disease was assessed using the literature review described above. Other viruses in the database were  
426 assigned the *Risk Level* of ‘Not known to cause disease’, unless stated otherwise.

427 **Table S22:** Risk Levels and associated Risk Level Scores assigned to the risk factor ‘Severity of the disease caused  
428 by the virus species in humans’

429

| <i>Risk Level</i>                               | <i>Risk Level Score</i> |
|-------------------------------------------------|-------------------------|
| Not known to cause disease                      | 1                       |
| Found in sick human of unknown cause of illness | 2                       |
| Mild illness                                    | 3                       |
| Severe illness                                  | 4                       |
| Deadly                                          | 5                       |

430

431 Virus Data Risk calculation:

432 *Risk Factor Influence* (1.886) x *Risk Level Score*

433 **Proportion of virus species that are known human pathogens in the viral family**

434 The proportion of virus species that are known human pathogens in a viral family was calculated from the number of  
 435 virulent (known to cause deadly, severe or mild illness) versus avirulent virus species in the ICTV list grouped by  
 436 virus family. Virulence was assessed using the literature review described above. Results were subsequently  
 437 grouped into categories: Very Low (0-10%), Low (10-25%), Medium (25-50%), High (50-75%) and Very High (75-  
 438 100%). The *Risk Level* was determined by the virus family to which the virus belongs.

439 **Table S23:** Risk Levels and associated Risk Level Scores assigned to the risk factor ‘Proportion of virus species that  
 440 are known human pathogens in the viral family’

| <i>Risk Level</i>   | <i>Risk Level Score</i> |
|---------------------|-------------------------|
| Very Low (0-10%)    | 1                       |
| Low (10-25%)        | 2                       |
| Medium (25-50%)     | 3                       |
| High (50-75%)       | 4                       |
| Very High (75-100%) | 5                       |

441

442 Virus Data Risk calculation:

443 *Risk Factor Influence (2.406) x Risk Level Score*

444 **Transmission between humans**

445 The ability of a virus to transmit between humans was assessed using the literature review described above in

446 ‘Reference Data Sources for Risk Factors and Viruses’. For newly-discovered viruses, a *Risk Level* of ‘Not known to

447 transmit’ was assigned, unless stated otherwise.

448 **Table S24:** Risk Levels and associated Risk Level Scores assigned to the risk factor ‘Transmission between

449 humans’

| <i>Risk Level</i>     | <i>Risk Level Score</i> |
|-----------------------|-------------------------|
| Not known to transmit | 1                       |
| Yes                   | 5                       |

450

451 Virus Data Risk calculation:

452 *Risk Factor Influence (2.782) x Risk Level Score*

453 **Ability of a virus to transmit between animals and humans**

454 A list of known zoonotic viruses was extracted from the database created by Johnson, *et al.* (8). Virus names were

455 updated to ICTV standards. Vector-borne viruses and viruses of animals that have been domesticated to be kept as

456 pets or used as food were removed, as well as Influenza viruses due to the overwhelming amount of data for this

457 group and the complexity of their subunits, resulting in a list of 38 viruses included in the analysis. For newly-

458 discovered viruses, a *Risk Level* of ‘Not known to transmit’ was assigned, unless stated otherwise.

459 **Table S25:** Risk Levels and associated Risk Level Scores assigned to the risk factor ‘Ability to transmit between

460 animals and humans’

| <i>Risk Level</i> | <i>Risk Level Score</i> |
|-------------------|-------------------------|
|-------------------|-------------------------|

|                       |   |
|-----------------------|---|
| Not known to transmit | 1 |
|-----------------------|---|

|     |   |
|-----|---|
| Yes | 5 |
|-----|---|

461

462 Virus Data Risk calculation:

463 Formula: *Risk Factor Influence* (2.921) x *Risk Level Score*

464 **Ability of the virus species to cause an epidemic**

465 The epidemicity of a virus species was categorized into *Risk Levels* according to historic records of small outbreaks

466 (a noticeable but small number of cases), large outbreak (large number of cases over a small area), epidemics (an

467 outbreak over a larger geographic area) or pandemic (an epidemic that has spread to multiple countries or regions of

468 the world, with sustained transmission) in humans, animals or both. The *Risk Level* was determined by the virus

469 species to which the virus belongs. For virus species within the ICTV list, incidences of outbreaks or

470 epidemics/pandemics were identified using the literature review described above in ‘Reference Data Sources for

471 Risk Factors and Viruses’. For newly-discovered viruses, a *Risk Level* of ‘No’ was allocated, unless stated otherwise.

472 **Table S26:** Risk Levels and associated Risk Level Scores assigned to the risk factor ‘Ability of the virus to cause an

473 epidemic’

| <i>Risk Level</i> | <i>Risk Level Score</i> |
|-------------------|-------------------------|
|-------------------|-------------------------|

|    |   |
|----|---|
| No | 0 |
|----|---|

|                                     |   |
|-------------------------------------|---|
| Outbreak or epidemic - animals only | 3 |
|-------------------------------------|---|

|                                       |   |
|---------------------------------------|---|
| Small outbreak - humans (+/- animals) | 3 |
|---------------------------------------|---|

|                                                   |   |
|---------------------------------------------------|---|
| Large outbreak or epidemic - humans (+/- animals) | 4 |
|---------------------------------------------------|---|

|                                 |   |
|---------------------------------|---|
| Pandemic - humans (+/- animals) | 5 |
|---------------------------------|---|

474

475 Virus Data Risk calculation:

476 *Risk Factor Influence (2.689) x Risk Level Score*

477 **Virus caused a pandemic in humans**

478 The historic or current ability of the virus to cause a pandemic in humans was determined from if the World Health  
479 Organization declared the virus as the cause of a pandemic(39). For newly-discovered viruses, a *Risk Level* of ‘No’  
480 was allocated, unless stated otherwise.

481 **Table S27:** Risk Levels and associated Risk Level Scores assigned to the risk factor ‘Virus caused a pandemic in  
482 humans’

| <i>Risk Level</i> | <i>Risk Level Score</i> |
|-------------------|-------------------------|
| No                | 0                       |
| Yes               | 5                       |

483

484 Virus Data Risk calculation:

485 Formula: *Risk Factor Influence (2.689) x Risk Level Score*

486 **Virulence of a virus species in terrestrial mammals/birds/other animals – NOT INCLUDED IN**

487 **TOP 31 RISK FACTORS**

488 Virulence of a virus species within each of the taxa groups (terrestrial mammals, birds, other animals) as a result of  
489 natural infections was classified according to symptoms and degree of pathology caused by a virus species to the  
490 relevant host: Severe Illness (unable to function in a normal manner), Mild Illness (limited disruption to function) or  
491 Not known to cause disease. Evidence of virulence via animal models or cell lines were not included. The *Risk Level*  
492 was determined by the virus species to which the virus belongs. For virus species within the ICTV list, severity of  
493 disease was assessed using the literature review described above. For newly-discovered viruses, a *Risk Level* of ‘Not  
494 known to cause disease’ was assigned, unless stated otherwise.

495 **Table S28:** Risk Levels and associated Risk Level Scores assigned to the risk factor ‘Virulence of a virus species in  
496 animal taxa’

| <i>Risk Level</i>          | <i>Risk Level Score</i> |
|----------------------------|-------------------------|
| Not known to cause disease | 1                       |
| Mild Illness               | 3                       |
| Severe Illness             | 4                       |
| Deadly                     | 5                       |

497

498 Virus Data Risk calculation:

499 Virulence - terrestrial mammals: *Risk Factor Influence* (1.602) x *Risk Level Score*

500 Virulence – birds: *Risk Factor Influence* (1.323) x *Risk Level Score*

501 Virulence - other animals: *Risk Factor Influence* (1.040) x *Risk Level Score*

502 **Proportion of virus species within a viral family that are known to infect more than 1 host species**

503 The proportion of virus species that are known to infect more than 1 host species within a viral family was then  
504 calculated from the total number of distinct host species per virus species in the NCBI nucleotide records for ICTV  
505 list (described above in ‘Reference Data Sources for Risk Factors and Viruses’). Unidentified host species were not  
506 included in calculations. *Risk Levels* were categorized as follows: Very Low (0-10%), Low (10-25%), Medium (25-  
507 50%), High (50-75%) or Very High (75–100%). The *Risk Level* for a virus was determined by the virus family to  
508 which the virus belongs.

509 **Table S29:** Risk Levels and associated Risk Level Scores assigned to the risk factor ‘Proportion of virus species  
510 within a viral family that are known to infect more than 1 species’

| <i>Risk Level</i> | <i>Risk Level Score</i> |
|-------------------|-------------------------|
| Very Low (1-10%)  | 1                       |
| Low (10-25%)      | 2                       |
| Medium (25-50%)   | 3                       |

High (50-75%) 4

Very High (75-100%) 5

511

512 Virus Data Risk calculation:

513 *Risk Factor Influence (1.950) x Risk Level Score*

514 **Transmission mode of the viral genus**

515 Due to limitations in knowledge of how individual viruses are transmitted, the transmission mode of the viral genus  
516 was used as a proxy for all viruses within that genus. Transmission modes were extracted from the ViralZone  
517 database(7) and grouped into relevant categories as per described in Antonovics, *et al.* (40), resulting in the  
518 following categories; Vertical/Maternal, Sexual, Direct, Airborne, Indirect-Environment, Indirect-Fomite and  
519 Indirect-Vector. *Risk Levels* were then calculated as the total number transmission group categories within the virus  
520 genus to which the virus belongs. Unknown transmission is only counted if no other transmission category is  
521 present.

522 **Table S30:** Risk Levels and associated Risk Level Scores assigned to the risk factor ‘Transmission mode of the  
523 virus genus’

| <i>Risk Level</i>     | <i>Risk Level Score</i> |
|-----------------------|-------------------------|
| 1 transmission group  | 0.714                   |
| 2 transmission groups | 1.428                   |
| 3 transmission groups | 2.142                   |
| 4 transmission groups | 2.856                   |
| 5 transmission groups | 3.570                   |
| 6 transmission groups | 4.284                   |
| 7 transmission groups | 4.998                   |

Unknown 2.5

---

524

525 Virus Data Risk calculation:

526 *Risk Factor Influence (2.597) x Risk Level Score*

527 **Geography of the virus in animals**

528 A custom function called “GeogVirus” was created in R software(13) using sqldf(15) to determine the virus  
529 distribution from the number of countries and WHO regions(23) in which the virus has been detected within the  
530 database. Using definitions of international spread adapted from Johnson, *et al.* (8), virus distribution was  
531 determined as: (1) National (small) – a single country with a land mass < 2.5 million km<sup>2</sup> (2) National (large) – a  
532 single country with a land mass > 2.5 million km<sup>2</sup>, (3) Regional – more than 1 country in 1 WHO region, (4) Semi-  
533 global – more than 1 country and 2-3 WHO regions, or (5) Global – more than 1 country and > 3 WHO regions. The  
534 Arctic region and Antarctica were each considered a country and their own respective WHO region. Country names  
535 or designations were defined as per the IUCN Red List database(11) based on ISO 3166 list of countries.

536 **Table S31:** Risk Levels and associated Risk Level Scores assigned to the risk factor ‘Geography of the virus in  
537 animals’

| <i>Risk Level</i> | <i>Risk Level Score</i> |
|-------------------|-------------------------|
| National - small  | 1                       |
| National - large  | 2                       |
| Regional          | 3                       |
| Semi-global       | 4                       |
| Global            | 5                       |

---

538

539 Virus Data Risk calculation:

540 *Risk Factor Influence (2.168) x Risk Level Score*



## 541 **Creating a Database of Viruses of Animal Origin**

### 542 *PREDICT Dataset*

543 Collection and Testing Animal Samples: Between 2009 and 2019, 74,635 individual animals were sampled from  
544 eleven mammalian and avian orders (*Anseriformes*, *Carnivora*, *Cetartiodactyla*, *Chiroptera*, *Eulipotyphla*,  
545 *Galliformes*, *Lagomorpha*, *Passeriformes*, *Primates*, *Rodentia*, *Scandentia*) at high-risk pathogen transmission  
546 interfaces in 28 countries as part of PREDICT surveillance. The research protocol was approved by the University  
547 of California Animal Care and Use Committee (IACUC) (permit 17504, 19300).

548 In the process of sample collection, geographic and demographic data about the host and its environment were  
549 recorded. Animals were given a unique identifier and species identified. In cases of uncertainty, animals were  
550 identified to the genus level. Fecal samples were either collected as a freshly voided specimen, or via rectal or anal  
551 swabs. Respiratory samples were obtained via an oral, nasal or oropharyngeal swab during handling. Additional  
552 samples included urogenital swabs and urine. Blood was collected via needle or syringe or a needle prick and blood  
553 spot on a collection card. When possible, duplicate samples were stored in up to 1 mL of Viral Transport Medium  
554 (VTM) and 1 mL of NucliSens® Lysis Buffer (bioMérieux, Inc., Marcy-l'Étoile, France). In cases where the animal  
555 was either previously euthanized (for example in restaurants) or an animal died during capture or handling (rare),  
556 tissue biopsies were collected and placed into VTM and NucliSens® Lysis Buffer.

557 A total of 509,721 samples were tested for DNA and RNA viral families and genera using PREDICT standardized  
558 conventional PCR protocols, cDNA extraction and sequencing as per previously described(41-53). Target viral  
559 families included members of the *Adenoviridae*, *Astroviridae*, *Picobirnaviridae*, *Retroviridae*, *Parvoviridae*,  
560 *Polyomaviridae*, *Picornaviridae*, *Coronaviridae*, *Reoviridae*, *Papillomaviridae*, *Paramyxoviridae*, *Arenaviridae*,  
561 *Bunyaviridae*, *Poxviridae* and *Filoviridae*

562 Eight hundred and fifty-five viruses were detected in samples from 7,726 individual animals belonging to 251  
563 mammalian species (plus 30 identified only to genus) within 26 countries. Viruses were classified by first  
564 comparing the distribution of pairwise sequence identities to define a % cut-off between taxa, and the resulting  
565 monophyletic groups were used as our operating taxonomic units. Groups that shared less nucleotide identity than  
566 the cut-off to a known sequence were labelled sequentially e.g., PREDICT\_CoV-1, -2, -3 etc.; while groups sharing  
567 more identity than the cut-off to a sequence already in GenBank were considered to be strains of a known virus and

568 assigned the same name as the matching sequence (e.g. Kenya\_bat\_CoV\_KY33 or HKU-9). Virus sequences and  
569 associated metadata are available in the USAID Data Development Library (<https://data.usaid.gov/>)

570 Additionally, for non-ICTV classified viruses that had previously been identified prior to PREDICT, Blastn searches  
571 were run on the virus sequences to identify closely related viruses with  $\geq 99\%$  identity,  $\geq 97\%$  query cover and a  
572 low E-value. The Pub Med Central (PMC) database was used to conduct a literature search of all publications citing  
573 the matching NCBI accession numbers. When available, host and sample information was extracted from nucleotide  
574 records and corresponding publications. Detection records were included in the dataset only if confirmed by PCR  
575 and sequencing.

576 **Figures S1 to S6**

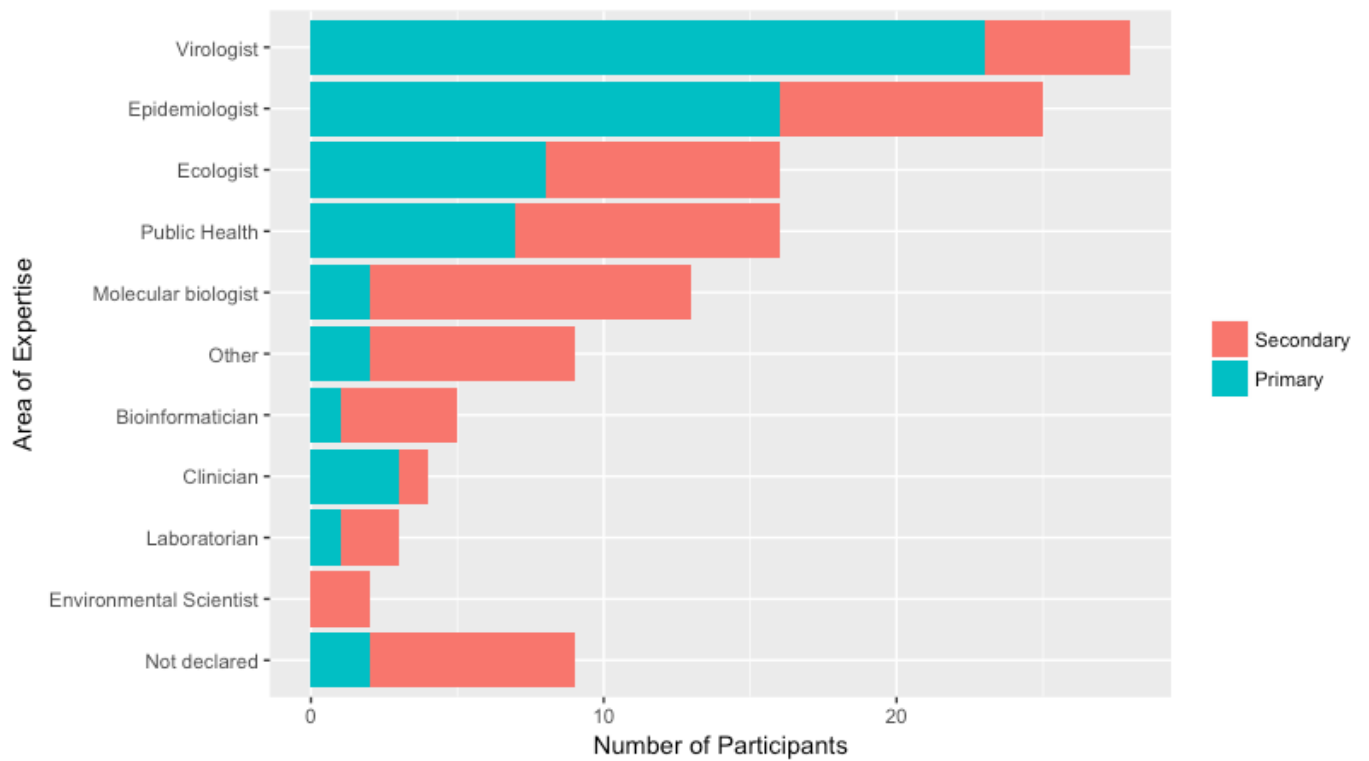

577

578 **Fig. S1** Participant (n = 65) reported areas of primary (blue) and secondary (red) expertise.

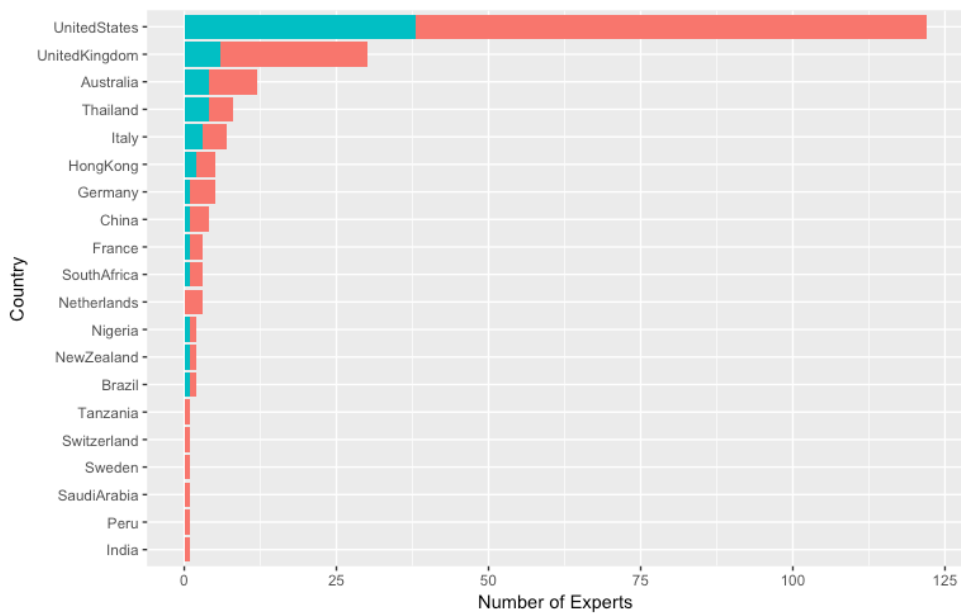

579

580 **Fig. S2** Number of experts (n = 150) recruited (blue) versus declined (red) to participate in the risk ranking survey

581 by country of residence.

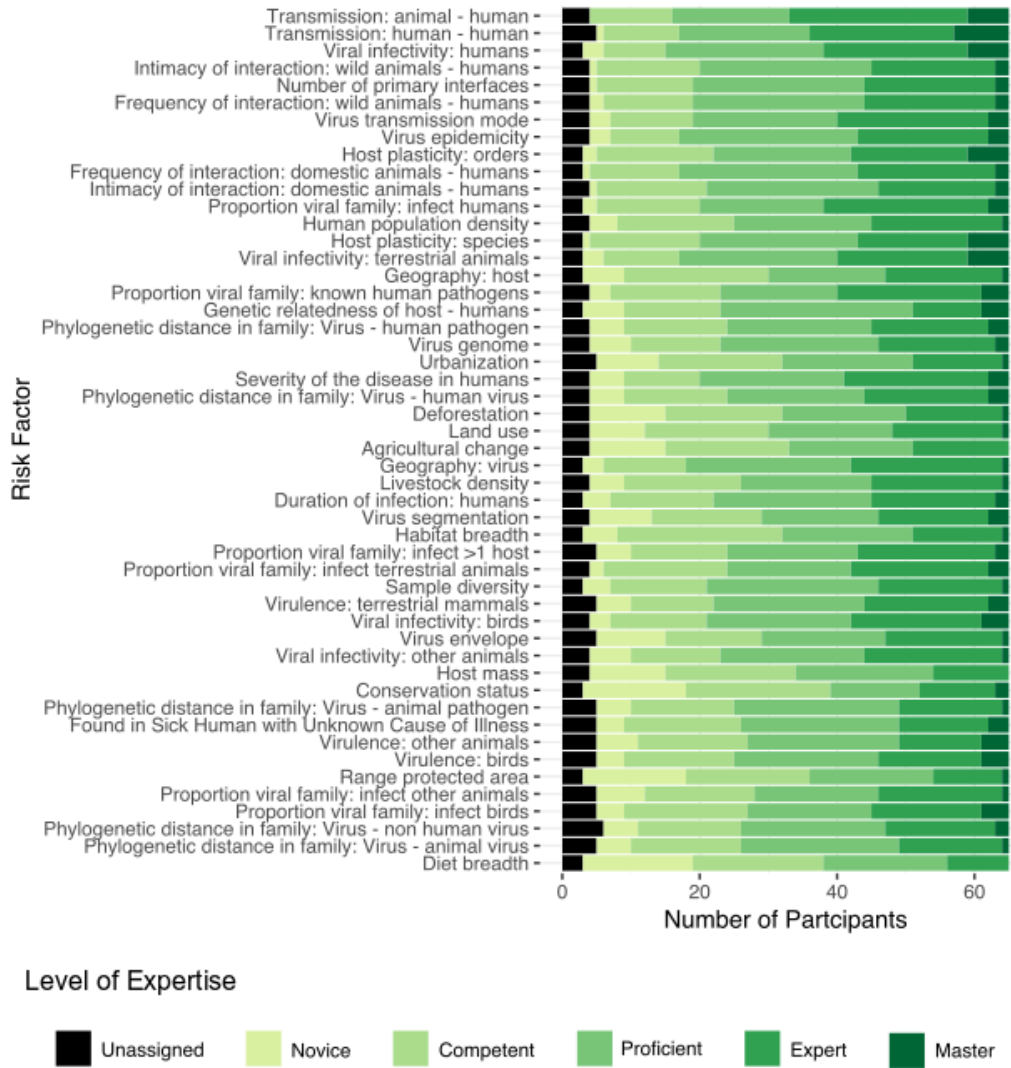

583

584 **Fig. S3** Participant (n = 65) self-assessment of their level of expertise for each factor in the risk ranking assessment.

585 Order of competence is represented by strength of hue from Novice (light green) to Master (dark green). If the

586 participant did not provide an answer, it was categorized as Unassigned (black).

587

588

589

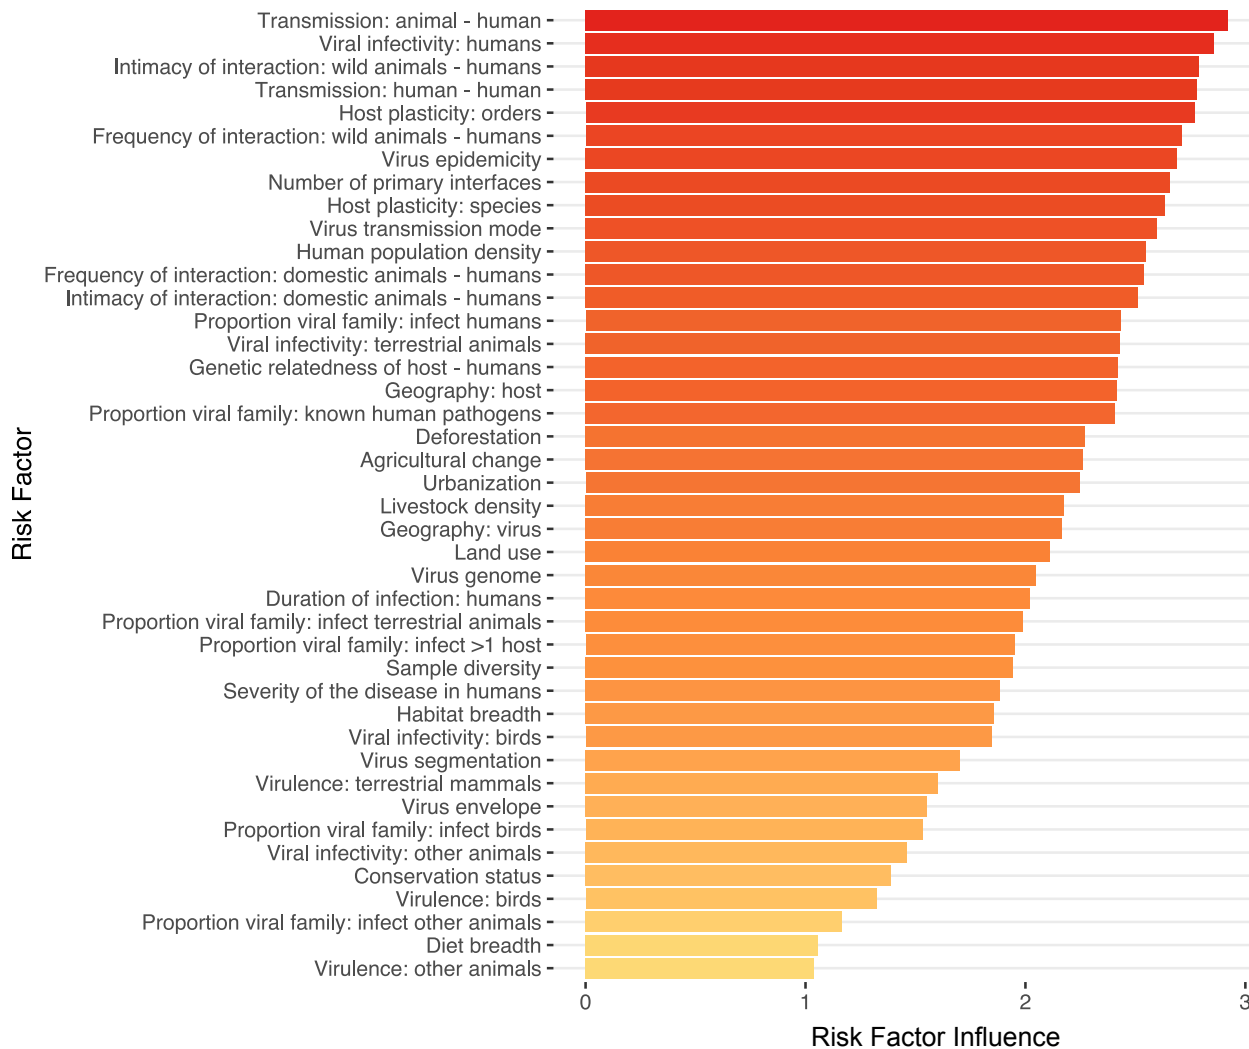

591  
 592 **Fig. S4** Expert opinion (n=65) of the contribution each factor explored in the risk ranking framework (n=42) plays  
 593 in the risk of a new virus spillover from animals to humans. *Risk Factor Influence* was calculated as a weighted  
 594 average risk score from the panelists on the assessed *Level of Risk* and their self-reported *Level of Expertise*.

**A**

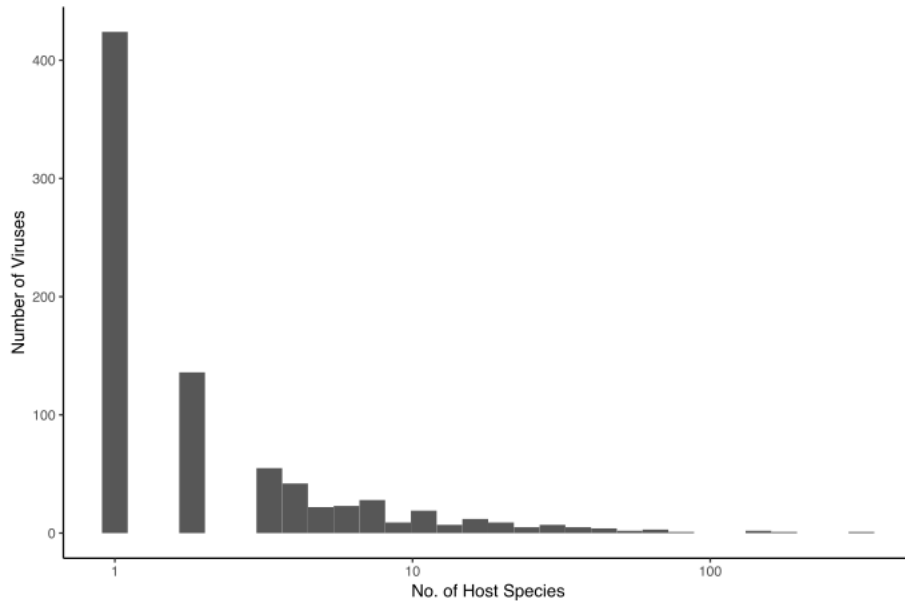

**B**

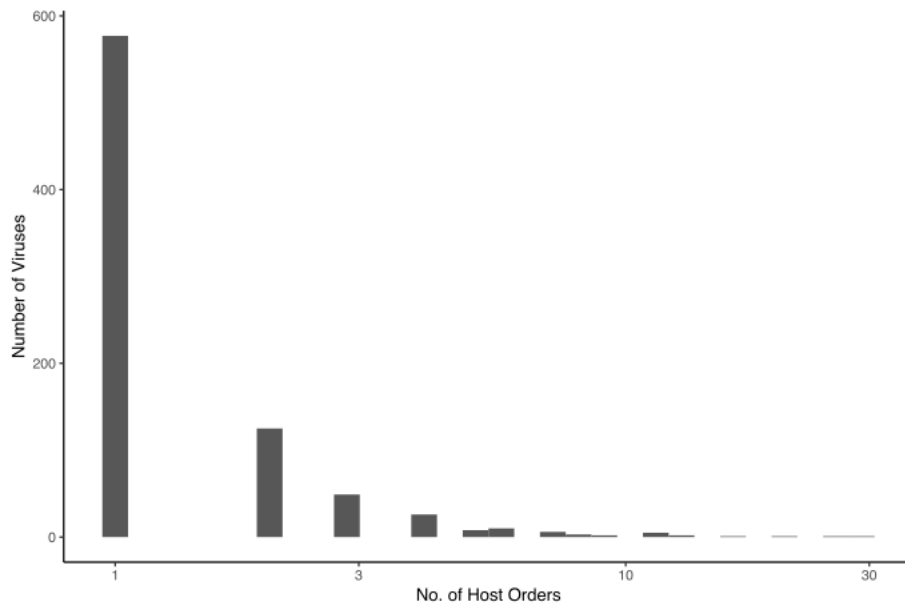

595

596 **Fig. S5** Number of host species and orders per virus from NCBI virus nucleotide records for 1,126 viruses from the

597 ICTV list.

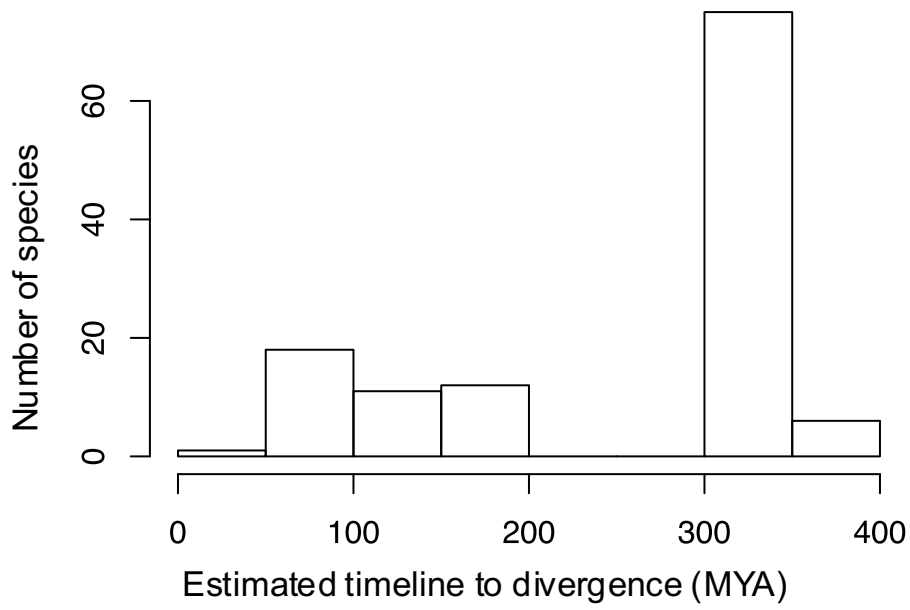

598

599 **Fig. S6** Estimated timeline of divergence between *Homo sapiens* and up to 2 (if available) randomly chosen species  
 600 per order in the classes *Amphibia*, *Reptilia*, *Aves* and *Mammalia*.

601

602

603

604

605

606

607

608

609

610 **Tables S32 to S33**

611 **Table S32** Affiliation of experts invited (n = 150) to participate in the risk ranking assessment.

| <b>Affiliation</b>            | <b>Number of Invitations</b> |
|-------------------------------|------------------------------|
| Government Department         | 2                            |
| Government Agency             | 19                           |
| Government Research Institute | 4                            |
| International Organization    | 9                            |
| Private Foundation            | 13                           |
| Private Organization          | 3                            |
| University                    | 100                          |

612

613

614

615

616

617

618

619

620

621

622



623 **Table S33** Options provided to the expert opinion panel in a worksheet for the *Level of Risk* each risk factor  
 624 contributes towards spillover risk, and self-assessed *Level of Expertise* in the factor subject. The scores were  
 625 allocated to options for use in *Risk Factor Influence* calculations.

|                           | Options      | Score |
|---------------------------|--------------|-------|
| <i>Level of Risk</i>      | High         | 3     |
|                           | Medium       | 2     |
|                           | Low          | 1     |
|                           | Not Relevant | 0     |
|                           | Unassigned   | 0     |
| <i>Level of Expertise</i> | Master       | 16    |
|                           | Expert       | 8     |
|                           | Proficient   | 4     |
|                           | Competent    | 2     |
|                           | Novice       | 1     |
|                           | Unassigned   | 8     |

626

627 **SI References**

- 628 1. D. Carroll *et al.*, The Global Virome Project. *Science* **359**, 872-874 (2018).  
 629 2. E. J. Dubovi, N. J. Maclachlan, Eds., *Fenner's Veterinary Virology* (Academic Press, Boston, 2016), 5 Ed.  
 630 3. C. Tidona, G. Darai, *The Springer Index of Viruses* (Springer, New York, USA, ed. 2, 2011), 10.1007/978-  
 631 0-387-95919-1.  
 632 4. C. J. Burrell, C. R. Howard, F. A. Murphy, *Fenner and White's Medical Virology* (Academic Press, ed.  
 633 Fifth Edition, 2017), pp. 604.

- 634 5. M. E. J. Woolhouse, L. Brierley, Epidemiological characteristics of human-infective RNA viruses. *Sci*  
635 *Data* **5**, 180017 (2018).
- 636 6. J. L. Geoghegan, A. M. Senior, F. Di Giallonardo, E. C. Holmes, Virological factors that increase the  
637 transmissibility of emerging human viruses. *Proc Natl Acad Sci U S A* **113**, 4170-4175 (2016).
- 638 7. C. Hulo *et al.*, ViralZone: a knowledge resource to understand virus diversity. *Nucleic Acids Res* **39**, D576-  
639 582 (2011).
- 640 8. C. K. Johnson *et al.*, Spillover and pandemic properties of zoonotic viruses with high host plasticity. *Sci*  
641 *Rep-Uk* **5** (2015).
- 642 9. Anaconda Software Distribution (2016) Anaconda.
- 643 10. P. J. Cock *et al.*, Biopython: freely available Python tools for computational molecular biology and  
644 bioinformatics. *Bioinformatics* **25**, 1422-1423 (2009).
- 645 11. IUCN (2017) The IUCN Red List of Threatened Species.
- 646 12. Y. Roskov *et al.* (2018) Species 2000 & ITIS Catalogue of Life, 2018 Annual Checklist. (Species 2000,  
647 Naturalis, Leiden, the Netherlands).
- 648 13. R Core Team (2013) R: a language and environment for statistical computing. (R Foundation for Statistical  
649 Computing, Vienna, Austria).
- 650 14. S. Chamberlain (2016) rredlist: 'IUCN' Red List Client.
- 651 15. G. Grothendieck (2017) sqldf: Manipulate R Data Frames Using SQL.
- 652 16. H. Wilman *et al.*, EltonTraits 1.0: Species-level foraging attributes of the world's birds and mammals.  
653 *Ecology* **95**, 2027-2027 (2014).
- 654 17. Anonymous, Bird species distribution maps of the world. <http://datazone.birdlife.org/species/requestdis>.
- 655 18. QGIS Development Team (2017) QGIS Geographic Information System. (Open Source Geospatial  
656 Foundation Project).

- 657 19. B. Vilela, F. Villalobos, letsR: a new R package for data handling and analysis in macroecology. *Methods*  
658 *in Ecology and Evolution* **6**, 1229-1234 (2015).
- 659 20. T. W. Bank. (2016) Land area (sq. km).
- 660 21. UNData (2007) Land Area.
- 661 22. C. I. Agency (2017) The World Factbook 2017. (Washington, DC).
- 662 23. World Health Organization (2017) Definition of region groupings.
- 663 24. S. Kumar, G. Stecher, M. Suleski, S. B. Hedges, TimeTree: A Resource for Timelines, Timetrees, and  
664 Divergence Times. *Mol Biol Evol* **34**, 1812-1819 (2017).
- 665 25. F. Nachtergaele, M. Pertri (2011) Mapping land use systems at global and regional scales for land  
666 degradation assessment analysis. in *Land degradation assessment in drylands*, ed A. Woodfine (FAO,  
667 Rome, Italy), pp 1–19.
- 668 26. R. J. Hijmans (2016) raster: Geographic Data Analysis and Modeling.
- 669 27. H. Wickham, The Split-Apply-Combine Strategy for Data Analysis. *2011* **40**, 29 (2011).
- 670 28. R. Bivand, T. Keitt, B. Rowlingson (2017) rgdal: Bindings for the Geospatial Data Abstraction Library.
- 671 29. Center for International Earth Science Information Network - CIESIN - Columbia University, Gridded  
672 Population of the World, Version 4 (GPWv4): Population Density Adjusted to Match 2015 Revision UN  
673 WPP Country Totals. NASA Socioeconomic Data and Applications Center (SEDAC).  
674 <http://dx.doi.org/10.7927/H4HX19NJ>. Deposited 20170810.
- 675 30. K. Seto, B. Güneralp, L. R. Hutyrá, Global Grid of Probabilities of Urban Expansion to 2030. NASA  
676 Socioeconomic Data and Applications Center (SEDAC). <http://dx.doi.org/10.7927/H4Z899CG>.
- 677 31. K. G. Kees, B. Arthur, v. D. Gerard, d. V. Martine, The HYDE 3.1 spatially explicit database of human-  
678 induced global land-use change over the past 12,000 years. *Global Ecology and Biogeography* **20**, 73-86  
679 (2011).
- 680 32. K. Klein Goldewijk, A. Beusen, P. Janssen, Long-term dynamic modeling of global population and built-up  
681 area in a spatially explicit way: HYDE 3.1. *The Holocene* **20**, 565-573 (2010).

- 682 33. A. Zvoleff (2015) gfcanalysis: Tools for Working with Hansen et al. Global Forest Change Dataset.
- 683 34. M. C. Hansen *et al.*, High-Resolution Global Maps of 21st-Century Forest Cover Change. *Science* **342**,  
684 850-853 (2013).
- 685 35. M. C. Hansen, S. V. Stehman, P. V. Potapov, Quantification of global gross forest cover loss. *Proc Natl*  
686 *Acad Sci US A* **107**, 8650-8655 (2010).
- 687 36. D.-H. Kim *et al.*, Global, Landsat-based forest-cover change from 1990 to 2000. *Remote Sensing of*  
688 *Environment* **155**, 178-193 (2014).
- 689 37. FAO (2015) FRA 2015: Terms and Definitions. in *Forest Resources Assessment Working Paper 180* (Food  
690 and Agriculture Organisation of the United Nations).
- 691 38. E. J. Lefkowitz, M. J. Adams, A. J. Davison, S. G. Siddell, P. Simmonds (2017) Virus Taxonomy: The  
692 Classification and Nomenclature of Viruses.
- 693 39. World Health Organization (2020) WHO Director-General's opening remarks at the media briefing on  
694 COVID-19 - 11 March 2020. pp [https://www.who.int/dg/speeches/detail/who-director-general-s-opening-  
695 remarks-at-the-media-briefing-on-covid-19---11-march-2020](https://www.who.int/dg/speeches/detail/who-director-general-s-opening-remarks-at-the-media-briefing-on-covid-19---11-march-2020).
- 696 40. J. Antonovics *et al.*, The evolution of transmission mode. *Philosophical Transactions of the Royal Society*  
697 *B: Biological Sciences* **372**, 20160083 (2017).
- 698 41. S. J. Anthony *et al.*, Non-random patterns in viral diversity. *Nat Commun* **6** (2015).
- 699 42. M. Aitichou, S. S. Saleh, A. K. McElroy, C. Schmaljohn, M. S. Ibrahim, Identification of Dobrava,  
700 Hantaan, Seoul, and Puumala viruses by one-step real-time RT-PCR. *J Virol Methods* **124**, 21-26 (2005).
- 701 43. S. J. Anthony *et al.* (2011) Laboratory Protocols for PREDICT Surveillance. (USAID PREDICT), pp 1-24.
- 702 44. A. Kapoor *et al.*, Identification and characterization of a new bocavirus species in gorillas. *PLoS One* **5**,  
703 e11948 (2010).
- 704 45. M. E. Lozano *et al.*, Characterization of arenaviruses using a family-specific primer set for RT-PCR  
705 amplification and RFLP analysis: Its potential use for detection of uncharacterized arenaviruses. *Virus*  
706 *Research* **49**, 79-89 (1997).

- 707 46. G. Moureau *et al.*, A real-time RT-PCR method for the universal detection and identification of  
708 flaviviruses. *Vector Borne Zoonotic Dis* **7**, 467-477 (2007).
- 709 47. P.-L. Quan *et al.*, Identification of a Severe Acute Respiratory Syndrome Coronavirus-Like Virus in a Leaf-  
710 Nosed Bat in Nigeria. *mBio* **1**, e00208-00210 (2010).
- 711 48. S. M. Raboni *et al.*, Clinical survey of hantavirus in southern Brazil and the development of specific  
712 molecular diagnosis tools. *Am J Trop Med Hyg* **72**, 800-804 (2005).
- 713 49. M. P. Sánchez-Seco, D. Rosario, E. Quiroz, G. Guzmán, A. Tenorio, A generic nested-RT-PCR followed  
714 by sequencing for detection and identification of members of the alphavirus genus. *J Virol Methods* **95**,  
715 153-161 (2001).
- 716 50. S. Tong, S.-W. W. Chern, Y. Li, M. A. Pallansch, L. J. Anderson, Sensitive and Broadly Reactive Reverse  
717 Transcription-PCR Assays To Detect Novel Paramyxoviruses. *Journal of Clinical Microbiology* **46**, 2652-  
718 2658 (2008).
- 719 51. S. Wacharapluesadee, T. Hemachudha, Duplex nested RT-PCR for detection of Nipah virus RNA from  
720 urine specimens of bats. *J Virol Methods* **141**, 97-101 (2007).
- 721 52. S. Watanabe *et al.*, Bat Coronaviruses and Experimental Infection of Bats, the Philippines. *Emerg Infect*  
722 *Dis* **16**, 1217-1223 (2010).
- 723 53. J. Zhai *et al.*, Rapid molecular strategy for filovirus detection and characterization. *Journal of clinical*  
724 *microbiology* **45**, 224-226 (2007).

725 **List of group authors**

726 <sup>8</sup>Expert panel group members: Kevin Anderson, Prasert Auewarakul, Lark Coffey, Ronald Corley, Gwenaelle  
727 Dauphin, Jonathan Epstein, Keiji Fukuda, Simon Goodman, Barbara Han, James Hughes, Martin Jeggo, William  
728 Karesh, Rudovick Kazwala, Terra Kelly, Gerald Keusch, Michael Kurilla, John Mackenzie, Wanda Markotter,  
729 Corina Monagin, David Morens, Vincent Munster, Elke Muhlberger, Pranav Pandit, Alison Peel, Dirk Pfeiffer,  
730 Olivier Restif, Oyewale Tomori, Jonathan Towner, Sylvie Van Der Werf, Sophie VonDobschetz, Supaporn  
731 Wacharapluesadee, Michael Ward, Lidewij Weirisma, Mary Wilson, David Wolking, Kachen Wongsathapornchai,

732 Liam Brierley, University of Edinburgh Epigroup members, Carlos Tambrana Torellio, and those who wish to  
733 remain anonymous.

734 <sup>9</sup>PREDICT Consortium group members: A. Marm Kilpatrick, Abd. Aziz Jamaluddin, Abdoulaye Ousmane Koutate,  
735 Abdul Hai, Abdul Kadir Abu Hashim, Abdulhameed Kataregga, Abdullah Al Mamun, Abdullah Al Shakil,  
736 Abdullah Alshammari, Abel Ekiri, Aboubacar Bamba, Abraham Commey, Aftab Uddin Rumi, Ageng Wiyatno,  
737 Aghnianditya Kresno Dewantari, Ahmed Kandeil, Ahmed Mostafa, Ahmed N. El Taweel, Ahmed S. Kayed, Aiah  
738 Gbakima, Ajay Narayan Sharma, Alaa Fahmawi, Alain Ondzie, Albert Ross, Alberto Perez, Aleksei A. Chmura,  
739 Alexandra Gibson, Alexandre Tremeau-Bravard, Alexter Japrin, Alice Latinne, Alice Mathew, Alisa Pereira,  
740 Allison White, Alonso Aguirre, Alpha Oumar Camara, Alphonse Msigwa, Alvis A. Sartee, Amadou Ndiaye,  
741 Amanda Fine, Amara Jambai, Amara Leno, Amethyst Gillis, Aminata Ba, Amira S. El Rifay, Ammar Rafidah  
742 Saptu, Amos G. Kollie, Anatole N'télo, Andrew Chow, Andrew Clements, Andrew Ginsos, Angela Yang, Angelica  
743 de Almeida Campos, Anna Willoughby, Anne Laudisoit, Antoine Mudakikwa, Ardjouma Dembele, Ariful Islam,  
744 Aristide Dionkounda, Ariunbaatar Barkhasbaatar, Arsene Mossoun Mossoun, Asha Makweta, Ashley Lucas, Ashok  
745 Chaudhary, Aung Myo Chit, Aung Than Toe, Ava Sullivan, Awa Deme, Bach Duc Luu, Basil H. Amarneh,  
746 Batchuluun Damdinjav, Batsikhan Sodnom, Baudelaire Zorine Nkouantsi, Ben Hu, Benard Ssebide, Benoit  
747 Goossens, Bilal Al Omari, Bishwo Shrestha, Bouaphanh Khamphaphongphane, Brad Schneider, Brett Smith, Brian  
748 Bird, Bridgette Smith, Brooke Genovese, Brooke Watson, Cale Basaraba, Carlos Zambrana-Torrelío, Carlos  
749 Zariquiey, Carolina Churchill, Catherine Doyle-Capitman, Catherine Machalaba, Catia de Paula, Celina Roy,  
750 Chandrawathani Panchadcharam, Changwen Ke, Charles Chiu, Charles Kumakamba, Chong Chee Kheong, Chris  
751 Whittier, Christian Lange, Christina Rundi, Christopher Kilonzo, Citra Livi Kowel, Corina Monagin, Cristin Young,  
752 Cynthia Nkoua, Daba Zoumarou, Damien Joly, Dan Marcelin Haba, Dan Rejmanek, Dang Duc Anh, Daniel Chai,  
753 Daniel K. Harris, Daniel N'guessan Saraka, Daniel O'Rourke, Daniel Simon, Dao Le Anh, Daouda Ndiaye, David  
754 Bunn, David McIver, David J. Wolking, Dawn Zimmerman, Debapriyo Chakraborty, Debbie Mollard, Denis  
755 Byaruba, Denise Greig, Dennis Carroll, Desalegn Belay, Dhiraj Puri, Diah Iskandriati, Diana Ramirez, Dibesh  
756 Karmacharya, Diego Montecino-Latorre, Djeneba Bamba, Dodi Safari, Dorothy Lim, Douokoro Kalivogui, Dulam  
757 Purevtseren, Eddy Kambale Syaluha, Eddy Rubin, Edison Durigon, Ehab Abu-Basha, Eliza Liang, Elizabeth  
758 Leasure, Elizabeth Loh, Elizabeth VanWormer, Emily Sion, Emily Hagan, Emma Mendelsohn, Emmanuel Couacy-  
759 Hymann, Emmanuel Larmouth, Emmanuel Mbuba, Emmanuel Tetteh, Enkhtuvshin Shiilegdamba, Eric Delwart,

760 Eric LeRoy, Eric Mbunwe, Erica Johnson, Erika Alandia Robles, Eugene Kouassi Koffi, Eunah Cho Preston,  
761 Evangeline Obodai, Fabien Niama, Fabiola Suárez, Fakhru Hata Musa, Fatima Hussein, Felix Nkom, Fernandes  
762 Opook, Fernando Nassar, Flavia Miranda, François Lamah, Frankie Thomas Sitam, Frantz Jean Louis, Gafur  
763 Sheikh, Ganzorig Baasan, Gaye Laye Diop, Gerard Bounga, Gerardo Suzan, Ghadeer Zghoul, Ghazi Kayali,  
764 Ghislain Dzeret Indolo, Gilda Grard, Glenda Ayala Aguilar, Grace Mwangoka, Guangjian Zhu, Hani Talafha,  
765 Hannah Chale, Happy Mkali, Harjeet Mann, Heather Wells, Helal Uddin, Helen Lee, Helena Henry, Henri-Joseph  
766 Parra, Hermann Assemien Krou, Herminio Ticona, Hoang Bich Thuy, Hongying Li, Huda Dursman, Ian Trupin,  
767 Ipos Ngay, Isabel Galarza, Isabel Moya, Isamara Navarrete-Macias, Jaber Belkhiria, Jackson Y. Poultonor, Jacques  
768 Iyanya, Jallah Arku, James Ayukebong, James Bangura, James Brandful, James Desmond, Janusz Paweska, Jasjeet  
769 Dhanota, Jason Euren, Jean Claude Tumushime, Jean Michel Takuo, Jean Paul Lukusa, Jean Vivien Mombouli,  
770 Jean-Jacques Muyembe Tamfum, Jeffrine Rovie Ryan Japning, Jennifer Lane, Jessica Schwind, Jimmy Lee, Jinnat  
771 Ferdous, Jocelyn Perez, Joël Akpaki, Joel Garcia, Joel Judson Jaimin, John Brownstein, Joko Pamungkas, Jonathan  
772 H. Epstein, Jordan Levinson, José Luis Mollericon, José R. Ferrer-Paris, Josefina Abedin, Joseph Awuni, Joseph  
773 Brown, Joseph Dikko Le Doux, Joseph Fair, Joseph Kamau, Joseph Malakalinga, Joseph Rosario, Joseph Turay,  
774 Jules Gomis, Julien Kalpy Coulibaly, Julius Lutwama, Julius Nwobegahay, Julius Nziza, Jum Rafiah Abd Sukor,  
775 Jun Liu, June Barrera, Junior Beal Akoundze, Jusuf Kalengkongan, Jyotsna Joshi, Kaiser Rahman, Kalil  
776 Doumbouya, Kandeh Kargbo, Karen Saylor, Kate Jones, Kate Thomas, Katherine Leasure, Ken Cameron, Kevin  
777 Gonzalez, Kevin Tolovou, Khebir Verasahib, Kidan Araya, Kimashalen Chor, Kimberly Dodd, Komal Jain, Kongsy  
778 Khammavong, Kortu M. Ndebe, Kpon Kakeuma Romeo Gueu, Kris Murray, Kristine Smith, Kyaw Yan Naing Tun,  
779 Lanash Thanda, Laura Benedict Mugok, Laurentius Ambu, Laurie Harris, Le Tin Vinh Quang, Leanne Wicker, Lee  
780 Heng Gee, Leilani Francisco, Lem Fui Fui, Leonoris Lojivis, Leticia Gutierrez, Libiao Zhang, Lim Ming Yao, Linda  
781 Boatema, Linda J. Lowenstine, Lucy O. Keatts, Luis Aguirre, Luis Barcena, Luz Dary Acevedo, Magassouba  
782 N'faly, Mahmoud M. Shehata, Mamadi Camara, Mame Cheikh Seck, Manisha Bista, Manjunatha Belaganahalli,  
783 Manuel Cespedes, Manzan Jean N'Guettia, Marc Levy, Marc Valitutto, Marcel Sidiki Kondiano, Marcela Uhart,  
784 Margret Bonason, Maria Makuwa, Maria Suleiman, Mariam Kourouma, Marie Pelagie Atrou Gbamele, Mark-Joel  
785 Akongo, Martin Gilbert, Ma-Sue Koffa, Mat LeBreton, Mathias Sango, Mathieu Pruvot, Matthew Blake, Maureen  
786 Miller, Md. Enayet Hossain, Md. Tarikul Islam, Meerjady Sabrina Flora, Megan Doyle, Megan Mitchell, Megan  
787 Vodzak, Mei Ho Lee, Melinda Rostal, Melissa Manhas, Melkor Sackie, Micaela De La Puente, Michael Cranfield,

788 Michael Garbo, Michael Grodus, Michael Westfall, Michel Koropo, Millawati Gani, Min Thein Maw, Mireille  
789 Dosso, Misliah Mohamad Basir, Mizanur Rahman, Moctar Mouiche, Modou Moustafa Lo, Moh Moh Htun,  
790 Mohamed Ahmed Ali, Mohamed Idriss Doumbouya, Mohammad Borhan Al-Zghoul, Mohammad Saifullah Mohd  
791 Azian, Mohammad Yuery Wazlan Abdul Wahad, Mohammed Sidibey, Mohammed Ziaur Rahman, Mohd Isnaim  
792 Ismail, Mohd Lutfi Abdullah, Moise Bendoua Tolno, Mokhtar R. Gomaa, Monica Romero, Mouhamed Sy, Moukala  
793 Ndolo Hilarion, Moushumi Hassan, Mustafa Ababneh, Mustafizur Rahman, Mwokozi Mwanzalila, Nancy Cavero,  
794 Nathan Wolfe, Neal Liang, Nenneh Kamara-Chieyoe, Ngo Thanh Long, Nguyen Duc Thinh, Nguyen Thanh  
795 Phuong, Nguyen Thi Diep, Nguyen Thi Hoa, Nguyen Thi Lan, Nguyen Thi Thanh Nga, Nguyen Thu Thuy, Nguyen  
796 Van Long, Nicole Gardner, Nicole Ureda, Nigatu Kebede, Nistara Randhawa, Noam Ross, Noorliza Noordin, Nor  
797 Adilah Aziz, Norhidayah Danial, Norsharina Arshat, Novie Kasenda, Novie Rachmitasari, Nur Amirah Md Sungif,  
798 Ohnmar Aung, Ola Ababneh, Ola Bagato, Olivier Nsengimana, Omnia Kutkat, Onkirotin Dionne Olva, Oscar Rico,  
799 Otilia Dogbey, Pacifique Musabimana, Pamela Roualdes, Parviez Hosseini, Patarapol Manecorn, Patricia Mendoza,  
800 Patricia Reed, Patrick Dawson, Paul Horwood, Pe Bhele Maomy, Peta Hitchens, Pete Marra, Pham Thi Bich Ngoc,  
801 Phan Quang Minh, Philippe Buchy, Philippe Dussart, Pierre Formenty, Pitu Biswas, Placide Mbala, Prajwol  
802 Manandhar, Pranav Pandit, Prateep Duengkae, Prime Mulembakani, Priscilla Joyner, Privat Godji Ghabro, Quaza  
803 Nizamuddin Hassan, Qun He, Rabeh El Shesheny, Rachael Mbabazi, Rachmitasari Noviana, Rafael Ojeda-Flores,  
804 Rahmat Topani, Rajindra Napit, Ramlan Mohamed, Rebecca Hill, Richard Suu-Ire, Ricky Okwir Okello, Ridzki  
805 M.F. Binol, Rima Shrestha, Rock Aimé Nina, Rodrigo Medellín, Rolando Limachi, Romain Bagamboula Mpassi,  
806 Ronald Herbert, Rosario Barradas, Rosario Rivera, Rudovick Kazwala, Runie David, Ruth Maganga, Saddam  
807 Hossain, Salif Camara, Saman Pradhan, Samath In, Samita Raut, Samsir Laimun, Samson Mutura, Samuel Bel-  
808 Nono, Sandra G. Samuels, Sandra Villar, Sara H. Mahmoud, Sayon Yombouno, Schadrack Niyonzima, Sen Nathan,  
809 Senthilvel K.S.S. Nathan, Serge Kaba, Shahanaj Shano, Shariful Islam, Shongo Lushima, Shusmita Dutta, Shu-Yi  
810 Zhang, Sia Alida Sayandouno, Sief Addeen Al Hanandeh, Simeon Fahn, Simon Anthony, Simone Dramou, Simorn  
811 Phon, Sinpakhome Singhalath, Sireeda Miller, Sokha Chea, Soubanh Silithammavong, Stephanie Martinez, Stephen  
812 Morse, Stephenie Ann Albart, Supaporn Wacharapluesadee, Suraya Hamid, Suryo Saputro, Sylvia Nakimera,  
813 Symphorosa Sipangkui, Tan Jun Ee, Tapan Dhole, Taylor Gabourie, Terra Kelly, Theingi Win Myat, Theodore  
814 Asigbee, Thiravat Hemachudha, Tierra Smiley Evans, Tiffany Bogich, Tin Tin Myaing, Tina Kusumaningrum, Titus  
815 Joe, Tom Hughes, Tracy Drazenovich, Tran Minh Phuc, Tran Nhu Duong, Tumendemberel Dorjnyam, Tunu



816 Mwamlima, Ubald Tamoufe, Ulaankhuu Ankhambaatar, Ungke Antonjaya, Uus Saepuloh, Valchy Bel-Bebi  
817 Miegakanda, Valere Kouamé Kouakou, Veasna Duong, Velsri Sharminie, Vibol Hul, Victor Lungay, Victoria  
818 Andrew, Victoria Ontiveros, Victoria Pereira, Victoria Sedor, Victorine Maptue, Vo Van Hung, Volga Iñíguez, Vu  
819 Sinh Nam, Vu Trong Duoc, W. Ian Lipkin, Wai Zin Thein, Walter Simon Magesa, Watthana Theppangna, Wendy  
820 Weisman, Wenjun Ma, William Ampofo, William Karesh, Wirda Damanik, Wivine Mouellet, Woutrina Smith,  
821 Xavier de Lamballerie, Xiaoyu Che, Xinglou Yang, Xingyi Ge, Yagouba Kane, Yanne Vanessa Mavoungou, Yasha  
822 Feferholtz, Yassmin Moatasim, Yohannes Negash, Yovanna Murillo, Yunzhi Zhang, Zahidah Izzati Zeid, Zaidoun  
823 Hijazeen, Zainal Zainuddin, Zena Babu Mchomvu, Zena Emmanuel, Zhengli Shi, Zikankuba Sijali, Zoe Greatorex,  
824 Zuhair Bani Ismail
